# Supplementary material for: Intraindividual variation in urinary iodine concentrations: effect of adjustment on population distribution using two and three repeated spot urine collections
Source: PubMed Central journal article supplement — BMJ Open. 2014 Jan 8;4(1):e003799. doi: 10.1136/bmjopen-2013-003799 (PMC3902374; doi:10.1136/bmjopen-2013-003799), 2014-01-08
Supplement: bmjopen-2013-003799.draft_revisions.pdf [file bmjopen-2013-003799.draft_revisions.pdf]

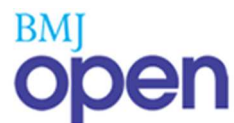

**Intra-individual variation in urinary iodine concentrations:  
effect of adjustment on population distribution using two  
and three repeated spot urine collections**

|                                    |                                                                                                                                                                                                                                                                                              |
|------------------------------------|----------------------------------------------------------------------------------------------------------------------------------------------------------------------------------------------------------------------------------------------------------------------------------------------|
| Journal:                           | <i>BMJ Open</i>                                                                                                                                                                                                                                                                              |
| Manuscript ID:                     | bmjopen-2013-003799                                                                                                                                                                                                                                                                          |
| Article Type:                      | Research                                                                                                                                                                                                                                                                                     |
| Date Submitted by the Author:      | 13-Aug-2013                                                                                                                                                                                                                                                                                  |
| Complete List of Authors:          | Charlton, Karen; University of Wollongong, School of Health Sciences<br>Batterham, Marijka; University of Wollongong, Statistical Consulting<br>Service<br>Buchanan, LiMin; University of Wollongong, School of Health Sciences<br>Mackerras, Dorothy; Food Standards Australia New Zealand, |
| <b>Primary Subject<br>Heading</b>: | Epidemiology                                                                                                                                                                                                                                                                                 |
| Secondary Subject Heading:         | Nutrition and metabolism, Public health                                                                                                                                                                                                                                                      |
| Keywords:                          | PUBLIC HEALTH, EPIDEMIOLOGY, NUTRITION & DIETETICS, PRIMARY<br>CARE                                                                                                                                                                                                                          |
|                                    |                                                                                                                                                                                                                                                                                              |

SCHOLARONE™  
Manuscripts

1  
2  
3 **Intra-individual variation in urinary iodine concentrations: effect of adjustment on**  
4 **population distribution using two and three repeated spot urine collections**  
5  
6  
7

8 Karen E Charlton, M.Phil (Epi), M.Sc., PhD, APD, School of Health Sciences, Faculty of  
9 Health and Behavioural Sciences, University of Wollongong, New South Wales, Australia  
10  
11

12  
13 Marijka J Batterham, M.Med.Stat., M.Sc(Nutr&Diet), PhD, AdvAPD, AStat, Statistical  
14 Consulting Service, University of Wollongong, NSW, Australia  
15  
16

17  
18 Li Min Tan Buchanan, B.Sc (Hons). School of Health Sciences, Faculty of Health and  
19 Behavioural Sciences, University of Wollongong, New South Wales, Australia  
20  
21

22  
23 Dorothy Mackerras, PhD, MPH, Office of the Chief Scientist, Food Standards Australia New  
24 Zealand, Canberra, ACT, Australia & Menzies School of Health Research, Institute of  
25 Advanced Studies, Charles Darwin University, Darwin, NT, Australia  
26  
27  
28  
29  
30

31  
32  
33  
34 Corresponding author: Associate Professor Karen Charlton, School of Health Sciences,  
35 Faculty of Health and Behavioural Sciences, University of Wollongong, Northfields Avenue,  
36 Wollongong, New South Wales, Australia.  
37  
38  
39

40  
41  
42 Tel: +61-2-42214754; Fax: +61-2-4221 3486. Email: karenc@uow.edu.au  
43  
44

45 **Contribution of each author:**  
46

47 Karen E Charlton: Conceptualisation of study design, drafting initial manuscript  
48

49 Marijka J Batterham: Statistical analysis, editing of manuscript.  
50

51  
52 Li Min Tan Buchanan: Participant recruitment, data collection, data entry, editing of  
53 manuscript.  
54  
55

56 Dorothy Mackerras: Statistical interpretation, editing of manuscript.  
57  
58  
59  
60

### Acknowledgements

A small grant was obtained from the Faculty of Health and Behavioural Sciences (Faculty Research Committee) of the University of Wollongong. The Faculty Research Committee had no role in the design, analysis or writing of this article. No authors have any conflicts of interest. Associate Professor Gary Ma is thanked for analysis of the urinary iodine concentrations. Joanna Russell provided editorial assistance.

Word count, excluding title page, abstract, references: 2591

For peer review only

## Summary

### *Article focus*

- The iodine status of populations is defined by calculating median urinary iodine concentrations (UIC) from spot urine samples collected in surveys.
- High intra-individual (day-to-day) variation in urinary iodine excretion leads to an overdispersed distribution.
- Methods used in other areas of research to correct for intra-individual variation were applied to three repeated spot urine collections from a sample of older Australians to estimate a UIC distribution more reflective of long-term usual status.

### *Key messages*

- Collection of a single urine sample leads to incorrect conclusions about the extremes of the population distribution of UIC.
- Adjustment using analysis of variance reduced the spread of the distribution more than calculating an average of each person's samples. Application of this method to surveillance of population iodine status and iodine fortification programmes could permit a more detailed assessment of the population and relevant subgroups.
- In this sample of older adults, three spot urine collections did not add value compared to two collections.

### ***Strengths and limitations:***

Older adults, who typically have a less varied diet than younger populations, were sampled therefore generalizability to other age groups may be limited.

## Abstract

Background: Iodine deficiency is assessed on a population level by comparing median spot urinary iodine concentrations (UIC) against references for pregnant and non-pregnant states. Intra-individual variation of a single UIC results in an overdispersed distribution and consequent errors in estimating the prevalence of deficiency and excess.

Methods: UIC data collected from 84 healthy volunteers, 60-95y from New South Wales, Australia, prior to the mandatory fortification programme, was used to determine the effect of adjustment for intra-individual variation on estimations of iodine deficiency and the population distribution. Three spot urine samples were collected, each one week apart. Repeated measures analysis of variance determined between-person ( $s_b$ ) and total ( $s_{obs}$ ) standard deviations. Adjusted UIC values were calculated as  $[(\text{person's UIC} - \text{group mean}) \times (s_b/s_{obs})] + \text{group mean}$ , and a corrected UIC distribution calculated.

Results: The  $s_b/s_{obs}$  for using 3-samples and 2-samples was 0.83 and 0.79, respectively.

Following adjustment for intra-individual variation, the proportion with UIC < 50 ug/L reduced from 33 % to 19%, while the proportion with UIC  $\geq$  100 ug/L changed from 21% to 17%. The 95<sup>th</sup> centile UIC decreased from 176 to 136  $\mu\text{g/L}$ . Adjustment by taking averages yielded a lesser degree of contraction in the distribution than the analysis of variance method.

Conclusions: The addition of information about intra-individual variability has potential for increasing the interpretability of UIC data collected to monitor the iodine status of a population.

**Keywords:** iodine, urinary iodine concentration, intra-individual variation, distribution

## Introduction

Iodine deficiency is one of the most common nutrient deficiencies in the world, with almost one billion people affected. Populations that consume diets that contain small amounts of fish and seafood, moderate to low quantities of milk and dairy products, and include locally produced fruits and vegetables grown in iodine-poor soils are likely to be iodine deficient.

Iodine deficiency impacts across the life stages.[1] It affects growth and development (both cognitive and motor) during pregnancy, infancy and childhood. In older adults, iodine deficiency may play a role in declining cognitive function.[1] Consequently, good quality population-level data on iodine status is required to assess population status and design strategies which correct any deficiency but avoid introducing excessive intakes. The iodine status of populations is defined by calculating urinary iodine concentrations (UIC) from spot urine samples collected in a representative sample and comparing the median UIC (MUIC) against reference ranges.[2] Daily urinary excretion of iodine closely reflects iodine intake in non-pregnant populations therefore MUIC of a group is considered to be a valid biomarker of the status of that group.[3] However, the concentration measured in a single spot sample has large variation from day-to-day within individuals,[4-6]. This increases the spread of the distribution [7, 8] so that it does not reflect the range of long-term or 'usual' iodine status around the median in the population. It is the usual intake of iodine, not the intake on any one day that determines iodine status of groups. Consequently, a method to reduce or remove the effects of the measurement error due to the intra-individual variation that results from collecting a single spot urine sample from each survey participant would allow greater description of the population status.

Several methods exist to correct for intra-individual variation in population survey data. One method is to collect multiple days of data on each survey participant and average the data for each participant. This has substantial logistical costs when conducting a national survey.

1  
2  
3 Another method is to apply a correction factor to the distribution.[8, 9] This requires  
4  
5 estimating the correction factor, for example by collecting multiple samples from a  
6  
7 representative subset of the survey population  
8  
9

10  
11 This second method has been applied many times to dietary intake data [10-12] but has been  
12  
13 applied less frequently to biochemical data.[13-15] In a survey of indigenous Australian  
14  
15 adolescents with MUIC of 51 ug/L, correcting the distribution based on two urine samples  
16  
17 per person, reduced the 95<sup>th</sup> centile from 129 ug/L to 92 ug/L.[13, 14] have highlighted the  
18  
19 widespread misuse of calculating the proportions of UIC below the cut-off level of 100 ug/L  
20  
21 to estimate the prevalence of iodine deficiency. This will over- or underestimate the  
22  
23 proportion with deficiency depending on the location of the median. In the previous  
24  
25 example,[13] the raw data would be misinterpreted as showing that 90% were <100 ug/L,  
26  
27 whereas this was 97% after correction for within person variation. In clearly deficient  
28  
29 populations, this difference is not important for program planning. However as a population  
30  
31 approaches sufficiency, accurate estimation becomes more important for refining programs.  
32  
33 Similarly in replete populations, an accurate estimate of the high intakes is needed to assess  
34  
35 whether part of the population is reaching potentially adverse levels.  
36  
37  
38  
39  
40  
41  
42

43 Remote indigenous people have a different lifestyle from that of urbanised non-Indigenous  
44  
45 Australians. In this study, we investigate the intra-individual variation in UIC in older non-  
46  
47 Indigenous Australians, living in an urban iodine deficient area prior to the introduction of  
48  
49 mandatory fortification. We extend previous work by examining the impact of having two  
50  
51 versus three samples for calculating the correction factor and compare this to the effect of  
52  
53 averaging the results for each person.  
54  
55  
56  
57  
58  
59  
60

## Methods

Between May and September 2009, 110 English-speaking men and women aged 60 - 95 years volunteered for a study that investigated the association between iodine status and cognition. Volunteers were recruited from a random selection of aged care facilities (independent, assisted and low care living) in the Illawarra region, south of Sydney in Australia. Of the 110 participants, 84 subjects (25 men) met the study inclusion criteria and were enrolled. Twenty-six subjects were excluded due to: a) diagnosed dementia and/or Alzheimer's disease, b) cognitive decline as indicated by a Mini-Mental State Examination (MMSE<sup>9</sup> score of  $\leq 23$ ,<sup>[16]</sup> c) a previous stroke, d) current use of thyroxine or any other medications that may affect memory, 5) uncontrolled hypertension (blood pressure (BP)  $\geq 160/95$  mm Hg), and e) uncontrolled diabetes (blood glucose (BG)  $\geq 7.8$  mmol/l). The study protocol was approved by the Human Research Ethics Committee of the University of Wollongong and all participants provided written informed consent.

Weight (Tanita Scale, TBG622, Tanita Inc., Tokyo, Japan) and height (stadiometer) of subjects were measured. Body mass index was calculated as the ratio of weight (kg) divided by height squared ( $m^2$ ).

Participants were provided with written instructions for spot urine sample collections, which included collection of the first voiding of the day, on the same day each week, where possible, over a three-week period. Urine samples were stored at  $-80^{\circ}C$  and batch-analysed by the accredited laboratory of the Institute of Clinical Pathology and Medical Research (ICPMR), Westmead Hospital (Sydney, NSW, Australia). UIC was analysed using an adaptation of the Sandell-Kolthoff method using a ammonium persulphate digestion and microplate reading.<sup>[17]</sup> The coefficient of variation (CV) of the urinary iodine assay in the



1  
2  
3 ICPMR laboratory is  $16.7\%$  at  $46 \pm 7.72 \mu\text{g/L}$ ,  $5.8\%$  at  $153 \pm 8.9 \mu\text{g/L}$ , and  $8.65\%$  at  $347 \pm$   
4  
5  $30 \mu\text{g/L}$ . The group MUIC was compared to population-specific reference values.[2]  
6  
7

8  
9  
10 The UIC data were transformed using the natural logarithm to improve normality. Repeated  
11  
12 measures analysis of variance was performed to determine the between-person ( $s_b$ ) and total  
13  
14 ( $s_{\text{obs}}$ ) standard deviations. An adjusted log UIC value was calculated for each person as [18]:  
15  
16 Adjusted UIC = [(person's day 1 UIC – group mean for day 1) \* ( $s_b \div s_{\text{obs}}$ )] + group mean for  
17  
18 day 1. (Equation 1)  
19

20  
21 The results were exponentiated. The adjustment procedure was performed twice using SAS  
22  
23 (V9.2, SAS Cary, NC). First the correction factor ( $s_b/s_{\text{obs}}$ ) was calculated using all three  
24  
25 replicates, then it was calculated using only the first two replicates.  
26  
27

28  
29  
30 We also calculated the average for each person using all three replicates and for the first two  
31  
32 replicates. Centiles of the distribution and the proportion below selected values were  
33  
34 calculated for the raw Day 1 data and for distributions derived using adjustment or averaging.  
35  
36 Descriptive analyses were performed using IBM SPSS (V19.0 IBM Corporation, Armonk  
37  
38 NY).  
39  
40  
41  
42

## 43 **Results**

44  
45 Sociodemographic characteristics of the study participants are shown in Table 1.  
46  
47  
48  
49  
50  
51  
52  
53  
54  
55  
56  
57  
58  
59  
60

**Table 1**

Demographic and clinical characteristics of the study subjects (n = 84)

| Characteristics                                                       | Subjects (n =84) (%)    |
|-----------------------------------------------------------------------|-------------------------|
| Sex (%)                                                               |                         |
| Men                                                                   | 25(30%)                 |
| Women                                                                 | 59(70%)                 |
| Age (years)                                                           | 74 ± 8 <sup>a</sup>     |
| BMI <sup>b</sup>                                                      |                         |
| Mean                                                                  | 28.4 ± 4.7 <sup>a</sup> |
| Underweight (< 18.5 kg/m <sup>2</sup> )                               | 0 (0%)                  |
| Normal Weight (18.5 - 24.9 kg/m <sup>2</sup> )                        | 16(19%)                 |
| Overweight (≥ 25 kg/m <sup>2</sup> )                                  | 45 (54%)                |
| Obese ≥ (30 kg/m <sup>2</sup> )                                       | 23 (27%)                |
| MNA score                                                             |                         |
| Mean                                                                  | 27.2 ± 3.6 <sup>a</sup> |
| Malnourished (< 17 points)                                            | 0 (0%)                  |
| At risk of Malnutrition (17 - 23.5 points)                            | 4 (5%)                  |
| Well-nourished (≥ 24 points)                                          | 78 (93%)                |
| Unknown                                                               | 2 (2%)                  |
| Barthel Index <sup>17</sup>                                           |                         |
| Able to independently perform activities of daily living (>50 points) | 84 (100%)               |
| MMSE score <sup>18</sup>                                              |                         |
| 0 to 23                                                               | 0 (0%)                  |
| 24-30                                                                 | 83 (99%)                |
| Unknown                                                               | 1 (1%)                  |
| Education level                                                       |                         |
| ≤ Year 12                                                             | 39 (47%)                |
| > Year 12                                                             | 44 (52%)                |
| Unknown                                                               | 1 (1%)                  |

<sup>a</sup> Mean ± standard deviation<sup>b</sup> Calculated as kg/m<sup>2</sup>

MUIC of the study population using the first spot urine collection indicated mild iodine deficiency (65.5 (IQR 42; 89)) µg/L). Correlations for transformed urinary iodine concentration values were: Days 1 and 2: r=0.48; p<0.01; Days 1 and 3: r=0.43; p<0.01; Days 2 and 3: r=0.41; p<0.01. The distribution of urinary iodine concentrations calculated by the different methods is shown in Table 2 and Figure 1. The  $s_b/s_{obs}$  was 0.83 when calculated using the three replicates and 0.79 when calculated using two replicates; i.e. the contraction in the distribution was slightly less with two replicates than three. Compared to the raw distribution, adjustment and averaging both reduced the spread of the distribution, especially

at the upper end owing to the right skew in the data. Following adjustment using the three urine collections, the MUIC remained unchanged but the IQR was shifted upwards 65.2 (55; 94) while the upper end of the distribution (95<sup>th</sup> centile) changed from 176 to 136 µg/L. The percentage of participants with UIC  $\geq$  100 ug/L decreased from 21 % to 17 % following adjustment.

**Table 2**

Urinary iodine concentration distribution, raw data from one day, after adjustment for intra-individual variation of two and three spot sample collections, and averages of multiple collections

| Centile                 | Urinary iodine concentration distributions (ug/L) |                            |                                    |                            |                                    |
|-------------------------|---------------------------------------------------|----------------------------|------------------------------------|----------------------------|------------------------------------|
|                         | Raw data for Day 1                                | Average of Day 1 and Day 2 | Day 1 corrected using 2 replicates | Average of Days 1, 2 and 3 | Day 1 corrected using 3 replicates |
| 5 <sup>th</sup>         | 32.25                                             | 29.7                       | 35.9                               | 31.3                       | 40.0                               |
| 10 <sup>th</sup>        | 35.50                                             | 35.5                       | 40.8                               | 38.3                       | 43.0                               |
| 25 <sup>th</sup>        | 42.25                                             | 48.6                       | 52.1                               | 55.2                       | 55.4                               |
| 50 <sup>th</sup>        | 65.5                                              | 65.5                       | 66.8                               | 69.0                       | 65.2                               |
| 75 <sup>th</sup>        | 89.5                                              | 99.1                       | 90.0                               | 98.9                       | 94.3                               |
| 90 <sup>th</sup>        | 123.5                                             | 146                        | 115.8                              | 138.8                      | 118.0                              |
| 95 <sup>th</sup>        | 175.8                                             | 167.4                      | 125.7                              | 170.5                      | 135.8                              |
| Maximum                 | 340.0                                             | 278.5                      | 204.8                              | 222.0                      | 167.9                              |
| Percent < 20ug/L        | 1%                                                | 0%                         | 0%                                 | 0%                         | 0%                                 |
| Percent <50 ug/L        | 33%                                               | 27%                        | 21%                                | 20%                        | 19%                                |
| Percent $\geq$ 100 ug/L | 21%                                               | 24%                        | 18%                                | 24%                        | 17%                                |

Taking an average of the three replicates also yielded similar results to taking an average of only two replicates. The averaging method contracted the distribution less than the adjustment method and, in particular had less effect in drawing the upper tail towards the median.

Figure 1 Population distribution of urinary iodine, according to number of days of spot urine collection

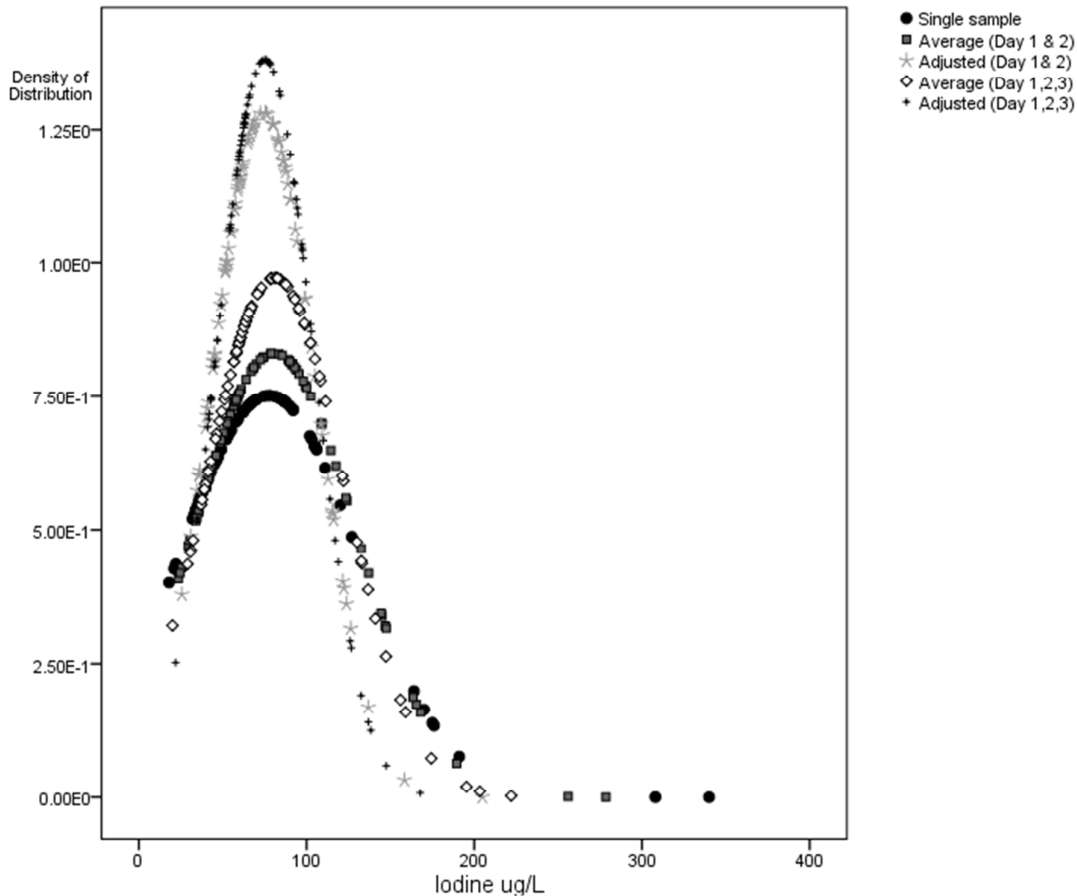

## Discussion

In this population with a suboptimal iodine status, the collection of a single urine sample from each participant would lead to different conclusions about the extremes of the population distribution of UIC. This has also been shown previously in Indigenous Australian adolescents [13] and young Swiss women.[14]

1  
2  
3 In our population, there was no gain in having three, rather than two, samples as both  
4  
5 adjustment factors were approximately 0.8 on the natural logarithmic scale. This means that  
6  
7 the standard deviation of the final distribution is 80% of the original. The lower the ratio, the  
8  
9 higher the correction - for example, a ratio of 0.5 would have resulted in a distribution with a standard  
10  
11 deviation of half the width of the original.[19] We do not know whether having a greater number  
12  
13 of replicates, such as seven or 14, or including different seasons, would have yielded the  
14  
15 same result. Our urinary findings are consistent with the low variability in dietary iodine  
16  
17 intake assessed at the same time in this population living in low level residential aged care  
18  
19 facilities.[20] A similar adjustment ratio of 0.69 on the natural logarithmic scale for UIC has  
20  
21 been reported in indigenous adolescents from the Darwin area, whose dietary patterns are  
22  
23 limited in variety.[13] We hypothesize that the degree of adjustment would be larger in other  
24  
25 populations that have more variety in food intake.  
26  
27  
28  
29

30  
31 Heterogeneity in the iodine content of different foods and their frequency of consumption in  
32  
33 different populations will affect the magnitude of intra-individual variability in UIC. This  
34  
35 suggests that the intra-individual variability in UIC would change after a fortification  
36  
37 program is introduced. It could be further hypothesised that the intra-individual variability  
38  
39 might increase if one or a small number of foods is fortified, particularly at high  
40  
41 concentrations. In Tasmania, the interquartile range widened as the MUIC value increased  
42  
43 following iodisation of salt (25-65g iodine/kg salt) used in bread. Pre-fortification, MUIC in  
44  
45 schoolchildren was 73 (IQR 56-100)  $\mu\text{g/L}$ , which increased to 108 (73-158)  $\mu\text{g/L}$  following  
46  
47 voluntary fortification, and to 132 $\mu\text{g/L}$  (96-198)  $\mu\text{g/L}$  post mandatory fortification. [21]  
48  
49  
50 However, it is not possible to compare these results to studies which report other parameters  
51  
52 for the UIC distribution such as the range [14] or the 10-90<sup>th</sup> centiles.[22] It is less clear  
53  
54 whether variability would increase or decrease if a wide range of foods are fortified and/or at  
55  
56  
57  
58  
59  
60

1  
2  
3 a lower concentration. We hypothesise that adjustment factors need to be reassessed if iodine  
4 intake changes and multiple factors might be needed if there is geographical variation in  
5 iodine status within a country.  
6  
7  
8  
9

10  
11 The greater narrowing in population distribution that results from the adjustment method,  
12 compared to the averaging method, is expected if multiple days are needed to estimate the  
13 long-term UIC for an individual. This is because the average of few days of urinary collection  
14 would still contain intra-individual variation. However, studies that collect a greater number  
15 of replicate samples than in the current study are still needed to compare the distribution  
16 determined by statistical adjustment to a directly assessed long-term average UIC.  
17  
18  
19  
20  
21  
22  
23  
24  
25  
26

27 Our study sample comprised older adults, a group who often have impaired renal function.  
28 We have previously suggested that spot urinary iodine concentrations may be under-  
29 estimating 24 hr excretion in this study population [20] but this would not impact on intra-  
30 individual variability of UIC which is the topic of the current paper. Any variation in day-to-  
31 day fluid intake would be included in the changing UIC for each person in the study on each  
32 day of collection. However, as the samples were all collected within a three week period, we  
33 would not have included any variation in fluid intake related to seasons. This would have  
34 underestimated the degree of adjustment in this population. However a reduction in total  
35 fluid intake, and therefore urine volume, might or might not affect the day-to-day variation.  
36  
37  
38  
39  
40  
41  
42  
43  
44  
45  
46  
47

48 In our study, we had replicate samples on all participants. A more logistically feasible  
49 alternative in a large survey is to collect the replicates in a representative sub-set and apply  
50 the adjustment factor calculated in the sub-set to the whole population. It may be necessary  
51 to subdivide the population, for example, by age and sex, and ensure that there are enough  
52 participants in each sub-division to permit a suitable range of adjustment factors to be  
53  
54  
55  
56  
57  
58  
59  
60

1  
2  
3 calculated. The method we have used [18] is the simplest of several methods that have a  
4 similar purpose.[23] The disadvantage of collecting replicates in a sub-set only is that,  
5  
6 although an estimate of the usual UIC distribution of the population is obtained, the method  
7  
8 treats each individual as representative of a larger group and so the value calculated for each  
9  
10 individual in Equation 1 is theoretical. Therefore, if it is desired to link intake with excretion  
11  
12 at an individual level, then replicate information about both intake and excretion for each  
13  
14 survey participant would be preferable but it is also possible to correct a regression  
15  
16 coefficient for within person variability.[24] In addition, the method we used assumes that  
17  
18 the data can be normalised. If this is not true, then alternatives include calculating an average  
19  
20 for each participant [25] or using a complex method such as the National Cancer Institute  
21  
22 method.[26]  
23  
24  
25  
26  
27  
28

## 29 **Conclusion**

30  
31 In a sample of healthy older Australian adults who were iodine deplete, the use of two or  
32  
33 three spot urine samples for adjustment of intra-individual variation in urinary iodine  
34  
35 concentration resulted in a narrowed population distribution, particularly at the upper end.  
36  
37 Statistical adjustment yielded a stronger correction than averaging the replicates. There was  
38  
39 no important gain in collecting a third sample in this population; however this finding might  
40  
41 be specific to our group and not generalizable to other age groups. The impact of the  
42  
43 adjustment in narrowing the distribution would be greater in groups with more varied dietary  
44  
45 intakes, and therefore wider intra-individual variation in UIC. These results provide a case for  
46  
47 further work to investigate the usefulness of determining adjustment factors to remove intra-  
48  
49 individual variability as part of population assessment of iodine status.  
50  
51  
52  
53  
54  
55  
56  
57  
58  
59  
60

## References

- 1 Zimmermann MB, Jooste PL, Pandav CS. Iodine-deficiency disorders. *Lancet* 2008;**372**:1251-62.
- 2 World Health Organization. Assessment of iodine deficiency disorders and monitoring their elimination. Geneva: WHO 2007.
- 3 Ristic-Medic D, Piskackova Z, Hooper L, *et al*. Methods of assessment of iodine status in humans: a systematic review. *Am J Clin Nutr* 2009;**89**:2052S-69S.
- 4 Rasmussen LB, Ovesen L, Bulow I, *et al*. Dietary iodine intake and urinary iodine excretion in a Danish population: effect of geography, supplements and food choice. *Br J Nutr* 2002;**87**:61-9.
- 5 Rasmussen LB, Ovesen L, Christiansen E. Day-to-day and within-day variation in urinary iodine excretion. *Eur J Clin Nutr* 1999;**53**:401-7.
- 6 Als C, Helbling A, Peter K, *et al*. Urinary iodine concentration follows a circadian rhythm: A study with 3023 spot urine samples in adults and children. *J Clin Endocrinol Metab* 2000;**85**:1367-9.
- 7 Andersen S, Karmisholt J, Pedersen KM, *et al*. Reliability of studies of iodine intake and recommendations for number of samples in groups and in individuals. *Br J Nutr* 2008;**99**:813-8.
- 8 Armstrong BK, White E, Saracci R. *Principles of exposure measurement in epidemiology*. Oxford; New York: Oxford University Press 1992.
- 9 Dyer AR, Shipley M, Elliott P. Urinary electrolyte excretion in 24 hours and blood-pressure in the Intersalt study. 1. Estimates of reliability *Am J Epi* 1994;**139**:927-39.
- 10 Subar AF, Dodd KW, Guenther PM, *et al*. The Food Propensity Questionnaire: Concept, development, and validation for use as a covariate in a model to estimate usual food intake. *J Am Diet Assoc* 2006;**106**:1556-63.



- 1  
2  
3 11 Freedman LS, Midthune D, Carroll RJ, *et al.* Adjustments to improve the estimation  
4 of usual dietary intake distributions in the population. *J Nutr* 2004;**134**:1836-43.  
5  
6  
7 12 Kipnis V, Midthune D, Buckman DW, *et al.* Modeling Data with Excess Zeros and  
8 Measurement Error: Application to Evaluating Relationships between Episodically  
9 Consumed Foods and Health Outcomes. *Biometrics* 2009;**65**:1003-10.  
10  
11  
12 13 Mackerras DEM, Singh GR, Eastman CJ. Iodine status of Aboriginal teenagers in the  
14 Darwin region before mandatory iodine fortification of bread. *Med J Aust* 2011;**194**:126-30.  
15  
16  
17 14 Zimmermann MB, Andersson M. Assessment of iodine nutrition in populations: past,  
18 present, and future. *Nutr Rev* 2012;**70**:553-70.  
19  
20  
21 15 Looker AC, Dallman PR, Carroll MD, *et al.* Prevalence of iron deficiency in the  
22 United States. *JAMA* 1997;**277**:973-6.  
23  
24  
25 16 Folstein MF, Folstein SE, McHugh PR. Mini-Mental State - practical method for  
26 grading cognitive state of patients for clinician *J Psych Res* 1975;**12**:189-98.  
27  
28  
29 17 Ohashi T, Yamaki M, Pandav CS, *et al.* Simple microplate method for determination  
30 of urinary iodine. *Clin Chem* 2000;**46**:529-36.  
31  
32  
33 18 Subcommittee on Interpretation and Uses of Dietary Reference Intakes, Reference  
34 SCotSEoD, Intakes. *Dietary Reference Intakes: Applications in Dietary Planning*.  
35 Washington, DC: The National Academies Press 2003.  
36  
37  
38 19 Baines J, Cunningham J, Leemhuis C, *et al.* Risk Assessment to Underpin Food  
39 Regulatory Decisions: An Example of Public Health Nutritional Epidemiology. *Nutrients*  
40 2011;**3**:164-85.  
41  
42  
43 20 Tan L, Charlton KE, Roodenrys S, *et al.* Validation of an iodine-specific Food  
44 Frequency Questionnaire to estimate dietary iodine intake in older Australians. *Nutr Diet*  
45 2012;**70**:71-8.  
46  
47  
48  
49  
50  
51  
52  
53  
54  
55  
56  
57  
58  
59  
60

- 1  
2  
3 21 Depaoli K, Seal JA, Taylor R. Progressive improvements in iodine status in Tasmania  
4 with voluntary then mandatory fortification: Preliminary results from the 2011  
5  
6 Tasmanian Urinary Iodine Survey. *Nutr Diet* 2012;**69 (Suppl 1)**:53.  
7  
8  
9  
10 22 U.S. Centers for Disease Control and Prevention. *Second National Report on*  
11 *Biochemical Indicators of Diet and Nutrition in the U.S. Population 2012*. Atlanta (GA):  
12 National Center for Environmental Health 2012.  
13  
14  
15  
16 23 National Cancer Institute. Usual Dietary Intakes: SAS Macros for Analysis of a  
17 Single Dietary Component. 2010:  
18  
19 [http://riskfactor.cancer.gov/diet/usualintakes/macros\\_single.html](http://riskfactor.cancer.gov/diet/usualintakes/macros_single.html).  
20  
21  
22  
23 24 Sempos CT, Johnson NE, Smith EL, *et al*. Effects of intraindividual and  
24 interindividual variation in repeated dietary records *Am J Epi* 1985;**121**:120-30.  
25  
26  
27 25 Food Standards Australia New Zealand (FSANZ). *The 2007 Australian National*  
28 *Children's Nutrition and Physical Activity Survey Volume Eight: Dietary exposure to food*  
29 *sourced chemicals*. Canberra: Department of Health and Ageing 2012.  
30  
31  
32  
33  
34 26 Tooze JA, Kipnis V, Buckman DW, *et al*. A mixed-effects model approach for  
35 estimating the distribution of usual intake of nutrients: The NCI method. *Stat Med*  
36 2010;**29**:2857-68.  
37  
38  
39  
40  
41  
42  
43  
44  
45  
46  
47  
48  
49  
50  
51  
52  
53  
54  
55  
56  
57  
58  
59  
60

1  
2  
3  
4  
5  
6  
7  
8  
9  
10  
11  
12  
13  
14  
15  
16  
17  
18  
19  
20  
21  
22  
23  
24  
25  
26  
27  
28  
29  
30  
31  
32  
33  
34  
35  
36  
37  
38  
39  
40  
41  
42  
43  
44  
45  
46  
47  
48  
49  
50  
51  
52  
53  
54  
55  
56  
57  
58  
59  
60

For peer review only

This paper is not a reliability study but we have used the Guidelines for Reporting Reliability and Agreement Studies (GRRAS) checklist as this seems to be the closest in terms of study design.

|                                                                                                        |                                                                                                                                                                                                                                                                                                                                                                                                                                                                                                                                                                                                                                                                                                                                                                                                                                                                                                                                                                                                                                                                                                                                                                                                                                                                                                                                                                                                                                                                                      | Page in manuscript where information appears |
|--------------------------------------------------------------------------------------------------------|--------------------------------------------------------------------------------------------------------------------------------------------------------------------------------------------------------------------------------------------------------------------------------------------------------------------------------------------------------------------------------------------------------------------------------------------------------------------------------------------------------------------------------------------------------------------------------------------------------------------------------------------------------------------------------------------------------------------------------------------------------------------------------------------------------------------------------------------------------------------------------------------------------------------------------------------------------------------------------------------------------------------------------------------------------------------------------------------------------------------------------------------------------------------------------------------------------------------------------------------------------------------------------------------------------------------------------------------------------------------------------------------------------------------------------------------------------------------------------------|----------------------------------------------|
| <b>TITLE AND ABSTRACT</b>                                                                              |                                                                                                                                                                                                                                                                                                                                                                                                                                                                                                                                                                                                                                                                                                                                                                                                                                                                                                                                                                                                                                                                                                                                                                                                                                                                                                                                                                                                                                                                                      |                                              |
| 1. Identify in title or abstract that interrater/intrarater reliability or agreement was investigated. | Title reflects the analysis performed” <b>Intra-individual variation in urinary iodine concentrations: Effect of adjustment on population distribution using two and three repeated spot urine collections .</b><br>“Abstract states “UIC data collected from 84 healthy volunteers, 60-95y from New South Wales, Australia, prior to the mandatory fortification programme was used to determine the effect of adjustment for intra-individual variation on estimations of iodine deficiency and the population distribution.”                                                                                                                                                                                                                                                                                                                                                                                                                                                                                                                                                                                                                                                                                                                                                                                                                                                                                                                                                      | Page 1 and 2                                 |
| <b>INTRODUCTION</b>                                                                                    |                                                                                                                                                                                                                                                                                                                                                                                                                                                                                                                                                                                                                                                                                                                                                                                                                                                                                                                                                                                                                                                                                                                                                                                                                                                                                                                                                                                                                                                                                      |                                              |
| 2. Name and describe the diagnostic or measurement device of interest explicitly                       | Measurement is repeated spot urine samples for analysis of Urinary Iodine Concentration (UIC). This is explained in detail, and the methodological problems associated with the single spot urine (currently the recommended method for population-level assessment of iodine status).                                                                                                                                                                                                                                                                                                                                                                                                                                                                                                                                                                                                                                                                                                                                                                                                                                                                                                                                                                                                                                                                                                                                                                                               | Pages 4 (2 <sup>nd</sup> para),5, and 6      |
| 3. Specify the subject population of interest.                                                         | This is adequately described as follows:<br><i>Remote indigenous people have a different lifestyle from that of urbanised non-Indigenous Australians. In this study, we investigate the intra-individual variation in UIC in older non-Indigenous Australians, living in an urban iodine deficient area prior to the introduction of mandatory fortification. We extend previous work by examining the impact of having two versus three samples for calculating the correction factor and compare this to the effect of averaging the results for each person.</i><br><i>Between May and September 2009, 110 English-speaking men and women aged 60 - 95 years volunteered for a study that investigated the association between iodine status and cognition. Volunteers were recruited from a random selection of aged care facilities (independent, assisted and low care living) in the Illawarra region, south of Sydney in Australia. Of the 110 participants, 84 subjects (25 men) met the study inclusion criteria and were enrolled. Twenty-six subjects were excluded due to: a) diagnosed dementia and/or Alzheimer’s disease, b) cognitive decline as indicated by a Mini-Mental State Examination (MMSE score of &lt;=23,[16] c) a previous stroke, d) current use of thyroxine or any other medications that may affect memory, 5) uncontrolled hypertension (blood pressure (BP) ≥ 160/95 mm Hg), and e) uncontrolled diabetes (blood glucose (BG) ≥ 7.8 mmol/l).</i> | Page 6                                       |
| 4. Specify the rater population of interest (if applicable).                                           | Not applicable to this paper                                                                                                                                                                                                                                                                                                                                                                                                                                                                                                                                                                                                                                                                                                                                                                                                                                                                                                                                                                                                                                                                                                                                                                                                                                                                                                                                                                                                                                                         |                                              |

|                                                                                                                                                |                                                                                                                                                                                                                                                                                                                                                                                                                                                                                                                                                                                                                                                                                                                                                                                                                                                             |                                                    |
|------------------------------------------------------------------------------------------------------------------------------------------------|-------------------------------------------------------------------------------------------------------------------------------------------------------------------------------------------------------------------------------------------------------------------------------------------------------------------------------------------------------------------------------------------------------------------------------------------------------------------------------------------------------------------------------------------------------------------------------------------------------------------------------------------------------------------------------------------------------------------------------------------------------------------------------------------------------------------------------------------------------------|----------------------------------------------------|
| 5. Describe what is already known about reliability and agreement and provide a rationale for the study (if applicable).                       | <p>Not reliability, but explains the purpose of the paper which addresses intra-individual variability in UIC, as follows:<br/> <i>Several methods exist to correct for intra-individual variation in population survey data. One method is to collect multiple days of data on each survey participant and average the data for each participant. This has substantial logistical costs when conducting a national survey. Another method is to apply a correction factor to the distribution.[8, 9] This requires estimating the correction factor, for example by collecting multiple samples from a representative subset of the survey population.</i></p> <p><i>This second method has been applied many times to dietary intake data [10-12] but has been applied less frequently to biochemical data.[13-15]</i></p>                                | Page 5, last para and page 6, 1 <sup>st</sup> para |
| METHODS                                                                                                                                        |                                                                                                                                                                                                                                                                                                                                                                                                                                                                                                                                                                                                                                                                                                                                                                                                                                                             |                                                    |
| 6. Explain how the sample size was chosen. State the determined number of raters, subjects/objects, and replicate observations.                | <p>This was a convenient sample, no power calculation performed. Of the 110 volunteers, 84 were eligible for inclusion. N = 84 – this is similar to another study that assessed variability in Australian indigenous adolescents (Mackerras et al. [10].).<br/>         Replicate observations (UIC) numbered three urine collections, taken one week apart.</p>                                                                                                                                                                                                                                                                                                                                                                                                                                                                                            | Page 6                                             |
| 7. Describe the sampling method.                                                                                                               | <p>Volunteers were recruited from a random selection of aged care facilities (independent, assisted and low care living) in the Illawarra region, south of Sydney in Australia. Exclusion criteria described in detail.</p>                                                                                                                                                                                                                                                                                                                                                                                                                                                                                                                                                                                                                                 | Page 6                                             |
| 8. Describe the measurement/rating process (e.g. time interval between repeated measurements, availability of clinical information, blinding). | <p>Replicate observations (UIC) numbered three urine collections, taken one week apart. Protocol for urine collection clearly described. Batch analysis of urinary iodine by the accredited laboratory of the Institute of Clinical Pathology and Medical Research (ICPMR), Westmead Hospital (Sydney, NSW, Australia) described and coefficient of variation (CV) of the urinary iodine assay provided.</p>                                                                                                                                                                                                                                                                                                                                                                                                                                                | Page 7                                             |
| 9. State whether measurements/ratings were conducted independently.                                                                            | <p>Measurements were spot urine collections, same protocol followed for each collection and the same laboratory measured all samples. Accreditation of the laboratory for this analysis is described.</p>                                                                                                                                                                                                                                                                                                                                                                                                                                                                                                                                                                                                                                                   | Page 7                                             |
| 10. Describe the statistical analysis.                                                                                                         | <p><i>Descriptive analyses were performed using IBM SPSS(V19.0 IBM Corporation, Armonk NY). The 3-day repeated urinary iodine concentration estimates were used to determine a corrected UIC distribution after taking the natural logarithm of the iodine concentration. Repeated measures analysis of variance was performed to determine the between-person (sb) and total (sobs) standard deviations. A corrected UIC value was calculated for each person by adjusting the transformed value for each person, according to the following formula[15] using SAS (V9.2, SAS Cary, NC): Adjusted UIC = [(person's UIC – group mean) * (sb ÷ sobs)] + group mean. After exponentiation, the distribution of UICs was recalculated using the adjusted values and compared to the unadjusted mean values as well as the spot UIC collected on Day 1.</i></p> | Page 7, 2 <sup>nd</sup> para                       |
| RESULTS                                                                                                                                        |                                                                                                                                                                                                                                                                                                                                                                                                                                                                                                                                                                                                                                                                                                                                                                                                                                                             |                                                    |
| 11. State the actual number of raters and subjects/objects which were included and the number of replicate                                     | See Table 2                                                                                                                                                                                                                                                                                                                                                                                                                                                                                                                                                                                                                                                                                                                                                                                                                                                 | Page 9                                             |

|                                                                                                                                                                                                                                                                                                                                                             |                                                                                                  |                                                                                                                                                                                                                                                                                                                                                                                                                                                                                                                                                                                                                                                                                                                                                                                                                                                                                                                                                                                                                                                                                                                                                                                                                                                                                                                                                                                                         |                   |
|-------------------------------------------------------------------------------------------------------------------------------------------------------------------------------------------------------------------------------------------------------------------------------------------------------------------------------------------------------------|--------------------------------------------------------------------------------------------------|---------------------------------------------------------------------------------------------------------------------------------------------------------------------------------------------------------------------------------------------------------------------------------------------------------------------------------------------------------------------------------------------------------------------------------------------------------------------------------------------------------------------------------------------------------------------------------------------------------------------------------------------------------------------------------------------------------------------------------------------------------------------------------------------------------------------------------------------------------------------------------------------------------------------------------------------------------------------------------------------------------------------------------------------------------------------------------------------------------------------------------------------------------------------------------------------------------------------------------------------------------------------------------------------------------------------------------------------------------------------------------------------------------|-------------------|
| 1<br>2<br>3<br>4<br>5<br>6<br>7<br>8<br>9<br>10<br>11<br>12<br>13<br>14<br>15<br>16<br>17<br>18<br>19<br>20<br>21<br>22<br>23<br>24<br>25<br>26<br>27<br>28<br>29<br>30<br>31<br>32<br>33<br>34<br>35<br>36<br>37<br>38<br>39<br>40<br>41<br>42<br>43<br>44<br>45<br>46<br>47<br>48<br>49<br>50<br>51<br>52<br>53<br>54<br>55<br>56<br>57<br>58<br>59<br>60 | observations which were conducted                                                                |                                                                                                                                                                                                                                                                                                                                                                                                                                                                                                                                                                                                                                                                                                                                                                                                                                                                                                                                                                                                                                                                                                                                                                                                                                                                                                                                                                                                         |                   |
|                                                                                                                                                                                                                                                                                                                                                             | 12. Describe the sample characteristics of raters and subjects (e.g. training, experience)       | Accreditation of the laboratory for this analysis is described.                                                                                                                                                                                                                                                                                                                                                                                                                                                                                                                                                                                                                                                                                                                                                                                                                                                                                                                                                                                                                                                                                                                                                                                                                                                                                                                                         | Page 6, last para |
|                                                                                                                                                                                                                                                                                                                                                             | 13. Report estimates of reliability and agreement including measures of statistical uncertainty. | <p>Estimates of reliability not appropriate to this study. Correct statistical results described as follows:</p> <p><i>MUIC of the study population using the first spot urine collection indicated mild iodine deficiency (65.5 (IQR 42; 89) µg/L). Correlations for transformed urinary iodine concentration values were: Days 1 and 2: <math>r=0.48</math>; <math>p&lt;0.01</math>; Days 1 and 3: <math>r=0.43</math>; <math>p&lt;0.01</math>; Days 2 and 3: <math>r=0.41</math>; <math>p&lt;0.01</math>. The distribution of urinary iodine concentrations calculated by the different methods is shown in Table 2 and Figure 1. The <math>s_r/s_{obs}</math> was 0.83 when calculated using the three replicates and 0.79 when calculated using two replicates; i.e. the contraction in the distribution was slightly less with two replicates than three. Compared to the raw distribution, adjustment and averaging both reduced the spread of the distribution, especially at the upper end owing to the right skew in the data. Following adjustment using the three urine collections, the MUIC remained unchanged but the IQR was shifted upwards 65.2 (55; 94) while the upper end of the distribution (95<sup>th</sup> centile) changed from 176 to 136 µg/L. The percentage of participants with UIC <math>\geq</math> 100 µg/L decreased from 21 % to 17 % following adjustment.</i></p> | Page 8, last para |

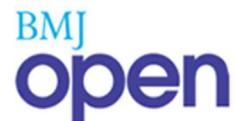

**Intra-individual variation in urinary iodine concentrations:  
effect of adjustment on population distribution using two  
and three repeated spot urine collections**

|                                    |                                                                                                                                                                                                                                                                                              |
|------------------------------------|----------------------------------------------------------------------------------------------------------------------------------------------------------------------------------------------------------------------------------------------------------------------------------------------|
| Journal:                           | <i>BMJ Open</i>                                                                                                                                                                                                                                                                              |
| Manuscript ID:                     | bmjopen-2013-003799.R1                                                                                                                                                                                                                                                                       |
| Article Type:                      | Research                                                                                                                                                                                                                                                                                     |
| Date Submitted by the Author:      | 08-Nov-2013                                                                                                                                                                                                                                                                                  |
| Complete List of Authors:          | Charlton, Karen; University of Wollongong, School of Health Sciences<br>Batterham, Marijka; University of Wollongong, Statistical Consulting<br>Service<br>Buchanan, LiMin; University of Wollongong, School of Health Sciences<br>Mackerras, Dorothy; Food Standards Australia New Zealand, |
| <b>Primary Subject<br>Heading</b>: | Epidemiology                                                                                                                                                                                                                                                                                 |
| Secondary Subject Heading:         | Nutrition and metabolism, Public health                                                                                                                                                                                                                                                      |
| Keywords:                          | PUBLIC HEALTH, EPIDEMIOLOGY, NUTRITION & DIETETICS, PRIMARY<br>CARE                                                                                                                                                                                                                          |
|                                    |                                                                                                                                                                                                                                                                                              |

SCHOLARONE™  
Manuscripts

1  
2  
3 **Intra-individual variation in urinary iodine concentrations: effect of adjustment on**  
4 **population distribution using two and three repeated spot urine collections**  
5  
6

7  
8 Karen E Charlton, M.Phil (Epi), M.Sc., PhD, APD, School of Health Sciences, Faculty of  
9 Health and Behavioural Sciences, University of Wollongong, New South Wales, Australia  
10

11  
12  
13 Marijka J Batterham, M.Med.Stat., M.Sc(Nutr&Diet), PhD, AdvAPD, AStat, Statistical  
14 Consulting Service, University of Wollongong, NSW, Australia  
15

16  
17  
18 Li Min Tan Buchanan, B.Sc (Hons). School of Health Sciences, Faculty of Health and  
19 Behavioural Sciences, University of Wollongong, New South Wales, Australia  
20

21  
22  
23 Dorothy Mackerras, PhD, MPH, Office of the Chief Scientist, Food Standards Australia New  
24 Zealand, Canberra, ACT, Australia & Menzies School of Health Research, Institute of  
25 Advanced Studies, Charles Darwin University, Darwin, NT, Australia  
26  
27  
28

29  
30  
31  
32  
33  
34 Corresponding author: Associate Professor Karen Charlton, School of Health Sciences,  
35 Faculty of Health and Behavioural Sciences, University of Wollongong, Northfields Avenue,  
36 Wollongong, New South Wales, Australia.  
37  
38

39  
40  
41  
42 Tel: +61-2-42214754; Fax: +61-2-4221 3486. Email: [karenc@uow.edu.au](mailto:karenc@uow.edu.au)  
43  
44  
45

46  
47  
48 Word count, excluding title page, abstract, references: 2591  
49

50  
51 **Keywords: iodine, urinary iodine concentration, intra-individual variation, distribution**  
52  
53  
54  
55  
56  
57  
58  
59  
60



## Abstract

Background: Iodine deficiency is assessed on a population level by comparing median spot urinary iodine concentrations (UIC) against references for pregnant and non-pregnant states. Intra-individual variation of a single UIC results in an overdispersed distribution and consequent errors in estimating the prevalence of deficiency and excess.

Methods: UIC data collected from 84 healthy volunteers, 60-95y from New South Wales, Australia, prior to the mandatory fortification programme, was used to determine the effect of adjustment for intra-individual variation on estimations of iodine deficiency and the population distribution. Three spot urine samples were collected, each one week apart. Repeated measures analysis of variance determined between-person ( $s_b$ ) and total ( $s_{obs}$ ) standard deviations. Adjusted UIC values were calculated as [(person's UIC – group mean) x ( $s_b/s_{obs}$ )] + group mean, and a corrected UIC distribution calculated.

Results: The  $s_b/s_{obs}$  for using 3-samples and 2-samples was 0.83 and 0.79, respectively.

Following adjustment for intra-individual variation, the proportion with UIC < 50 µg/L reduced from 33 % to 19%, while the proportion with UIC ≥ 100 µg/L changed from 21% to 17%. The 95<sup>th</sup> centile UIC decreased from 176 to 136 µg/L. Adjustment by taking averages yielded a lesser degree of contraction in the distribution than the analysis of variance method.

Conclusions: The addition of information about intra-individual variability has potential for increasing the interpretability of UIC data collected to monitor the iodine status of a population.

## Summary

### *Article focus*

- The iodine status of populations is defined by calculating median urinary iodine concentrations (UIC) from spot urine samples collected in surveys.
- High intra-individual (day-to-day) variation in urinary iodine excretion leads to an overdispersed distribution.
- Methods used in other areas of research to correct for intra-individual variation were applied to three repeated spot urine collections from a sample of older Australians to estimate a UIC distribution more reflective of long-term usual status.

### *Key messages*

- Collection of a single urine sample leads to incorrect conclusions about the extremes of the population distribution of UIC.
- Adjustment using analysis of variance reduced the spread of the distribution more than calculating an average of each person's samples. Application of this method to surveillance of population iodine status and iodine fortification programmes could permit a more detailed assessment of the population and relevant subgroups.
- In this sample of older adults, three spot urine collections did not add value compared to two collections.

### *Strengths and limitations:*

Older adults, who typically have a less varied diet than younger populations, were sampled therefore generalizability to other age groups may be limited.

## Introduction

Iodine deficiency is one of the most common nutrient deficiencies in the world, with almost one billion people affected. Populations that consume diets that contain small amounts of fish and seafood, moderate to low quantities of milk and dairy products, and include locally produced fruits and vegetables grown in iodine-poor soils are likely to be iodine deficient. Iodine deficiency impacts across the life stages.[1] It affects growth and development (both cognitive and motor) during pregnancy, infancy and childhood. In older adults, iodine deficiency may play a role in declining cognitive function.[1] Consequently, good quality population-level data on iodine status is required to assess population status and design strategies which correct any deficiency but avoid introducing excessive intakes. The iodine status of populations is defined by calculating urinary iodine concentrations (UIC) from spot urine samples collected in a representative sample and comparing the median UIC (MUIC) against reference ranges.[2] Daily urinary excretion of iodine closely reflects iodine intake in non-pregnant populations therefore MUIC of a group is considered to be a valid biomarker of the status of that group.[3] However, the concentration measured in a single spot sample has large variation from day-to-day within individuals,[4-6]. This increases the spread of the distribution [7, 8] so that it does not reflect the range of long-term or 'usual' iodine status around the median in the population. It is the usual intake of iodine, not the intake on any one day that determines iodine status of groups. Consequently, a method to reduce or remove the effects of the measurement error due to the intra-individual variation that results from collecting a single spot urine sample from each survey participant would allow greater description of the population status.

Several methods exist to correct for intra-individual variation in population survey data. One method is to collect multiple days of data on each survey participant and average the data for each participant. This has substantial logistical costs when conducting a national survey.

1  
2  
3 Another method is to apply a correction factor to the distribution.[8, 9] This requires  
4  
5 estimating the correction factor, for example by collecting multiple samples from a  
6  
7 representative subset of the survey population  
8  
9

10  
11 This second method has been applied many times to dietary intake data [10-12] but has been  
12  
13 applied less frequently to biochemical data.[13-15] In a survey of indigenous Australian  
14  
15 adolescents with MUIC of 51  $\mu\text{g/L}$ , correcting the distribution based on two urine  
16  
17 samples per person, reduced the 95<sup>th</sup> centile from 129  $\mu\text{g/L}$  to 92  $\mu\text{g/L}$ . [13, 14]  
18  
19 have highlighted the widespread misuse of calculating the proportions of UIC below the cut-  
20  
21 off level of 100  $\mu\text{g/L}$  to estimate the prevalence of iodine deficiency. This will over- or  
22  
23 underestimate the proportion with deficiency depending on the location of the median. In the  
24  
25 previous example,[13] the raw data would be misinterpreted as showing that 90% were <100  
26  
27  $\mu\text{g/L}$ , whereas this was 97% after correction for within person variation. In clearly  
28  
29 deficient populations, this difference is not important for program planning. However as a  
30  
31 population approaches sufficiency, accurate estimation becomes more important for refining  
32  
33 programs. Similarly in replete populations, an accurate estimate of the high intakes is needed  
34  
35 to assess whether part of the population is reaching potentially adverse levels.  
36  
37  
38  
39  
40  
41  
42

43 Remote indigenous people have a different lifestyle from that of urbanised non-Indigenous  
44  
45 Australians. In this study, we investigate the intra-individual variation in UIC in older non-  
46  
47 Indigenous Australians, living in an urban iodine deficient area prior to the introduction of  
48  
49 mandatory fortification. We extend previous work by examining the impact of having two  
50  
51 versus three samples for calculating the correction factor and compare this to the effect of  
52  
53 averaging the results for each person.  
54  
55  
56  
57  
58  
59  
60

## Methods

### *Participants and recruitment*

Between May and September 2009, 110 adults aged 60 - 95 years volunteered for a study that investigated the association between iodine status and cognition. English-speaking men and women were recruited from a random selection of aged care facilities (independent, assisted and low care living) in the Illawarra region, south of Sydney in Australia. Of the 110 participants, 84 subjects (25 men) met the study inclusion criteria and were enrolled. Twenty-six subjects were excluded due to: a) diagnosed dementia and/or Alzheimer's disease, b) cognitive decline as indicated by a Mini-Mental State Examination (MMSE score of  $\leq 23$ ), [16] c) a previous stroke, d) current use of thyroxine or any other medications that may affect memory, 5) uncontrolled hypertension (blood pressure (BP)  $\geq 160/95$  mm Hg), and e) uncontrolled diabetes (blood glucose (BG)  $\geq 7.8$  mmol/l). The study protocol was approved by the Human Research Ethics Committee of the University of Wollongong and all participants provided written informed consent.

Weight (Tanita Scale, TBG622, Tanita Inc., Tokyo, Japan) and height (stadiometer) of subjects were measured. Body mass index was calculated as the ratio of weight (kg) divided by height squared ( $m^2$ ). Nutritional status was assessed using the 18-item Mini Nutritional Assessment (MNA) which has been previously validated in older adults and classifies according to categories of well nourished, at-risk, or malnourished.[17] The Barthel index [18] was administered to assess ability to perform Activities of Daily Living, with a score of  $>50/100$  indicating independence.

### *Biochemical data*

1  
2  
3 Participants were provided with written instructions for spot urine sample collections, which  
4 included collection of the first voiding of the day, on the same day each week, where  
5 possible, over a three-week period. Urine samples were stored at -80°C and batch-analysed  
6 by the accredited laboratory of the Institute of Clinical Pathology and Medical Research  
7 (ICPMR), Westmead Hospital (Sydney, NSW, Australia). UIC was analysed using an  
8 adaptation of the Sandell-Kolthoff method using a ammonium persulphate digestion and  
9 microplate reading.[19] The coefficient of variation (CV) of the urinary iodine assay in the  
10 ICPMR laboratory is 16.7% at  $46 \pm 7.72 \mu\text{g/L}$ , 5.8% at  $153 \pm 8.9 \mu\text{g/L}$ , and 8.65% at  $347 \pm$   
11  $30 \mu\text{g/L}$ . The group MUIC was compared to population-specific reference values.[2]

### 22 *Statistical analyses*

23  
24 The UIC data were transformed using the natural logarithm to improve normality. Repeated  
25 measures analysis of variance was performed to determine the between-person ( $s_b$ ) and total  
26 ( $s_{obs}$ ) standard deviations. An adjusted log UIC value was calculated for each person as[20] :  
27  
28 Adjusted UIC = [(person's day 1 UIC – group mean for day 1) \* ( $s_b \div s_{obs}$ )] + group mean for  
29 day 1. (Equation 1)

30  
31 The results were exponentiated. The adjustment procedure was performed twice using SAS  
32 (V9.2, SAS Cary, NC). First the correction factor ( $s_b/s_{obs}$ ) was calculated using all three  
33 replicates, then it was calculated using only the first two replicates.

34  
35 We also calculated the average for each person using all three replicates and for the first two  
36 replicates. Centiles of the distribution and the proportion below selected values were  
37 calculated for the raw Day 1 data and for distributions derived using adjustment or averaging.  
38 Descriptive analyses were performed using IBM SPSS (V19.0 IBM Corporation, Armonk  
39 NY).

## Results

Sociodemographic characteristics of the study participants are shown in Table 1. All except four (5%) were classified as being well nourished according to the MNA classification, with the remainder in the “at risk” category. All participants were independently able to perform activities of daily living.

**Table 1**

Demographic and clinical characteristics of the study subjects (n = 84)

| Characteristics                                | Subjects (n (%))        |
|------------------------------------------------|-------------------------|
| Sex (%)                                        |                         |
| Men                                            | 25(30%)                 |
| Women                                          | 59(70%)                 |
| Age (years)                                    | 74 ± 8 <sup>a</sup>     |
| BMI <sup>b</sup>                               |                         |
| Mean                                           | 28.4 ± 4.7 <sup>a</sup> |
| Underweight (< 18.5 kg/m <sup>2</sup> )        | 0 (0%)                  |
| Normal Weight (18.5 - 24.9 kg/m <sup>2</sup> ) | 16(19%)                 |
| Overweight (≥ 25 kg/m <sup>2</sup> )           | 45 (54%)                |
| Obese ≥ (30 kg/m <sup>2</sup> )                | 23 (27%)                |
| Education level                                |                         |
| ≤ Year 12                                      | 39 (47%)                |
| > Year 12                                      | 44 (52%)                |
| Unknown                                        | 1 (1%)                  |

<sup>a</sup> Mean ± standard deviation

<sup>b</sup> Calculated as kg/m<sup>2</sup>

MUIC of the study population using the first spot urine collection indicated mild iodine deficiency (65.5 (IQR 42; 89)) µg/L). Correlations for transformed urinary iodine concentration values were: Days 1 and 2: r=0.48; p<0.01; Days 1 and 3: r=0.43; p<0.01; Days 2 and 3: r=0.41; p<0.01. The distribution of urinary iodine concentrations calculated by the different methods is shown in Table 2 and Figure 1. The  $s_b/s_{obs}$  was 0.83 when calculated using the three replicates and 0.79 when calculated using two replicates; i.e. the contraction in the distribution was slightly less with two replicates than three. Compared to the raw distribution, adjustment and averaging both reduced the spread of the distribution, especially

at the upper end owing to the right skew in the data. Following adjustment using the three urine collections, the MUIC remained unchanged but the IQR was shifted upwards 65.2 (55; 94) while the upper end of the distribution (95<sup>th</sup> centile) changed from 176 to 136  $\mu\text{g/L}$ . The percentage of participants with UIC < 100  $\mu\text{g/L}$  increased decreased from 79 % to 83 % following adjustment.

**Table 2**

Urinary iodine concentration distribution, raw data from one day, after adjustment for intra-individual variation of two and three spot sample collections, and averages of multiple collections

| Centile                       | Urinary iodine concentration distributions ( $\mu\text{g/L}$ ) |                            |                                    |                            |                                    |
|-------------------------------|----------------------------------------------------------------|----------------------------|------------------------------------|----------------------------|------------------------------------|
|                               | Raw data for Day 1                                             | Average of Day 1 and Day 2 | Day 1 corrected using 2 replicates | Average of Days 1, 2 and 3 | Day 1 corrected using 3 replicates |
| 5 <sup>th</sup>               | 32.25                                                          | 29.7                       | 35.9                               | 31.3                       | 40.0                               |
| 10 <sup>th</sup>              | 35.50                                                          | 35.5                       | 40.8                               | 38.3                       | 43.0                               |
| 25 <sup>th</sup>              | 42.25                                                          | 48.6                       | 52.1                               | 55.2                       | 55.4                               |
| 50 <sup>th</sup>              | 65.5                                                           | 65.5                       | 66.8                               | 69.0                       | 65.2                               |
| 75 <sup>th</sup>              | 89.5                                                           | 99.1                       | 90.0                               | 98.9                       | 94.3                               |
| 90 <sup>th</sup>              | 123.5                                                          | 146                        | 115.8                              | 138.8                      | 118.0                              |
| 95 <sup>th</sup>              | 175.8                                                          | 167.4                      | 125.7                              | 170.5                      | 135.8                              |
| Maximum                       | 340.0                                                          | 278.5                      | 204.8                              | 222.0                      | 167.9                              |
| Percent < 20 $\mu\text{g/L}$  | 1%                                                             | 0%                         | 0%                                 | 0%                         | 0%                                 |
| Percent < 50 $\mu\text{g/L}$  | 33%                                                            | 27%                        | 21%                                | 20%                        | 19%                                |
| Percent < 100 $\mu\text{g/L}$ | 79%                                                            | 76%                        | 82%                                | 76%                        | 83%                                |

Taking an average of the three replicates also yielded similar results to taking an average of only two replicates. The averaging method contracted the distribution less than the adjustment method and, in particular had less effect in drawing the upper tail towards the median.



## Discussion

In this population with a suboptimal iodine status, the collection of a single urine sample from each participant would lead to different conclusions about the extremes of the population distribution of UIC. This has also been shown previously in Indigenous Australian adolescents [13] and young Swiss women.[14]

In our population, there was no gain in having three, rather than two, samples as both adjustment factors were approximately 0.8 on the natural logarithmic scale. This means that the standard deviation of the final distribution is 80% of the original. The lower the ratio, the higher the correction - for example, a ratio of 0.5 would have resulted in a distribution with a standard deviation of half the width of the original.[21] We do not know whether having a greater number of replicates, such as seven or 14, or including different seasons, would have yielded the same result. Our urinary findings are consistent with the low variability in dietary iodine intake assessed at the same time in this population living in low level residential aged care facilities.[22] A similar adjustment ratio of 0.69 on the natural logarithmic scale for UIC has been reported in indigenous adolescents from the Darwin area, whose dietary patterns are limited in variety.[13] We hypothesize that the degree of adjustment would be larger in other populations that have more variety in food intake.

Heterogeneity in the iodine content of different foods and their frequency of consumption in different populations will affect the magnitude of intra-individual variability in UIC. This suggests that the intra-individual variability in UIC would change after a fortification

1  
2  
3 program is introduced. It could be further hypothesised that the intra-individual variability  
4 might increase if one or a small number of foods is fortified, particularly at high  
5 concentrations. In Tasmania, the interquartile range widened as the MUIC value increased  
6 following iodisation of salt (25-65g iodine/kg salt) used in bread. Pre-fortification, MUIC in  
7 schoolchildren was 73 (IQR 56-100) µg/L, which increased to 108 (73-158) µg/L following  
8 voluntary fortification, and to 132µg/L (96-198) µg/L) post mandatory fortification.[23]  
9  
10 However, it is not possible to compare these results to studies which report other parameters  
11 for the UIC distribution such as the range [14] or the 10-90<sup>th</sup> centiles.[24] It is less clear  
12 whether variability would increase or decrease if a wide range of foods are fortified and/or at  
13 a lower concentration. We hypothesise that adjustment factors need to be reassessed if iodine  
14 intake changes and multiple factors might be needed if there is geographical variation in  
15 iodine status within a country.  
16  
17  
18  
19  
20  
21  
22  
23  
24  
25  
26  
27  
28  
29  
30  
31

32 The greater narrowing in population distribution that results from the adjustment method,  
33 compared to the averaging method, is expected if multiple days are needed to estimate the  
34 long-term UIC for an individual. This is because the average of few days of urinary collection  
35 would still contain intra-individual variation. However, studies that collect a greater number  
36 of replicate samples than in the current study are still needed to compare the distribution  
37 determined by statistical adjustment to a directly assessed long-term average UIC. Another  
38 consideration is the use of spot urine samples as a proxy for assessment of iodine status on a  
39 population level. A spot sample does not reflect intake over an entire day for which a 24-hour  
40 collection would be needed. Konig et al [25] have reported a trend for higher intra-individual  
41 variation for spot UIC (38 %) versus measured 24-hour urinary iodine excretion (32 %),  
42  
43  
44  
45  
46  
47  
48  
49  
50  
51  
52  
53  
54  
55  
56  
57  
58  
59  
60

1  
2  
3 Our study sample comprised older adults, an age group who have been studied least for  
4 iodine status, and who also often have impaired renal function. We have previously  
5 suggested that spot urinary iodine concentrations may be under-estimating 24 hr excretion in  
6 this study population [22] but this would not impact on intra-individual variability of UIC  
7 which is the topic of the current paper. Any variation in day-to-day fluid intake would be  
8 included in the changing UIC for each person in the study on each day of collection.  
9

10  
11 However, as the samples were all collected within a three week period, we would not have  
12 included any variation in fluid intake related to seasons. This may have underestimated the  
13 degree of adjustment in this population. However a reduction in total fluid intake, and  
14 therefore urine volume, might or might not affect the day-to-day variation.  
15

16  
17 In our study, we had replicate samples on all participants. A more logistically feasible  
18 alternative in a large survey is to collect the replicates in a representative sub-set and apply  
19 the adjustment factor calculated in the sub-set to the whole population. It may be necessary  
20 to subdivide the population, for example, by age and sex, and ensure that there are enough  
21 participants in each sub-division to permit a suitable range of adjustment factors to be  
22 calculated. The method we have used [20] is the simplest of several methods that have a  
23 similar purpose.[26] The disadvantage of collecting replicates in a sub-set only is that,  
24 although an estimate of the usual UIC distribution of the population is obtained, the method  
25 treats each individual as representative of a larger group and so the value calculated for each  
26 individual in Equation 1 is theoretical. Therefore, if it is desired to link intake with excretion  
27 at an individual level, then replicate information about both intake and excretion for each  
28 survey participant would be preferable but it is also possible to correct a regression  
29 coefficient for within person variability.[27] In addition, the method we used assumes that  
30 the data can be normalised. If this is not true, then alternatives include calculating an average  
31  
32  
33  
34  
35  
36  
37  
38  
39  
40  
41  
42  
43  
44  
45  
46  
47  
48  
49  
50  
51  
52  
53  
54  
55  
56  
57  
58  
59  
60

1  
2  
3 for each participant [28] or using a complex method such as the National Cancer Institute  
4  
5 method.[29]  
6  
7  
8

### 9 10 **Conclusion**

11  
12 In a sample of healthy older Australian adults who were iodine deplete, the use of two or  
13  
14 three spot urine samples for adjustment of intra-individual variation in urinary iodine  
15  
16 concentration resulted in a narrowed population distribution, particularly at the upper end.  
17  
18 Statistical adjustment yielded a stronger correction than averaging the replicates. There was  
19  
20 no important gain in collecting a third sample in this population; however this finding might  
21  
22 be specific to our group and not generalizable to other age groups. The impact of the  
23  
24 adjustment in narrowing the distribution would be greater in groups with more varied dietary  
25  
26 intakes, and therefore wider intra-individual variation in UIC. These results provide a case for  
27  
28 further work to investigate the usefulness of determining adjustment factors to remove intra-  
29  
30 individual variability as part of population assessment of iodine status.  
31  
32  
33  
34  
35  
36  
37  
38  
39  
40  
41  
42  
43  
44  
45  
46  
47  
48  
49  
50  
51  
52  
53  
54  
55  
56  
57  
58  
59  
60

**Figure legend:**

Figure 1 Population distribution of urinary iodine, according to number of days of spot urine collection

**Contribution of each author:**

Karen E Charlton: Conceptualisation of study design, drafting initial manuscript

Marijka J Batterham: Statistical analysis, editing of manuscript.

Li Min Tan Buchanan: Participant recruitment, data collection, data entry, editing of manuscript.

Dorothy Mackerras: Statistical interpretation, editing of manuscript.

**Acknowledgements**

A small grant was obtained from the Faculty of Health and Behavioural Sciences (Faculty Research Committee) of the University of Wollongong. The Faculty Research Committee had no role in the design, analysis or writing of this article. No authors have any conflicts of interest. Associate Professor Gary Ma is thanked for analysis of the urinary iodine concentrations. Joanna Russell provided editorial assistance.

**Funding**

**This work was supported by the** University of Wollongong Faculty Research Committee

**Competing Interests**

None

**Data sharing**

No additional data available.

## References

1. Zimmermann MB, Jooste PL, Pandav CS. Iodine-deficiency disorders. *Lancet*. 2008;**372**:1251-62.
2. World Health Organization. Assessment of iodine deficiency disorders and monitoring their elimination. 3rd Edition ed. Geneva: WHO; 2007.
3. Ristic-Medic D, Piskackova Z, Hooper L, et al. Methods of assessment of iodine status in humans: a systematic review. *Am J Clin Nutr*. 2009;**89**:2052S-69S.
4. Rasmussen LB, Ovesen L, Christiansen E. Day-to-day and within-day variation in urinary iodine excretion. *Eur J Clin Nutr*. 1999;**53**:401-7.
5. Rasmussen LB, Ovesen L, Bulow I, et al. Dietary iodine intake and urinary iodine excretion in a Danish population: effect of geography, supplements and food choice. *Br J Nutr*. 2002;**87**:61-9.
6. Als C, Helbling A, Peter K, et al. Urinary iodine concentration follows a circadian rhythm: A study with 3023 spot urine samples in adults and children. *J Clin Endocrinol Metab*. 2000;**85**:1367-9.
7. Andersen S, Karmisholt J, Pedersen KM, et al. Reliability of studies of iodine intake and recommendations for number of samples in groups and in individuals. *Br J Nutr*. 2008;**99**:813-8.
8. Armstrong BK, White E, Saracci R. Principles of exposure measurement in epidemiology. Oxford: Oxford University Press; 1992.
9. Dyer AR, Shipley M, Elliott P. Urinary electrolyte excretion in 24 hours and blood-pressure in the Intersalt study. 1. Estimates of reliability *Am J Epi*. 1994;**139**:927-39.

- 1  
2  
3 10. Subar AF, Dodd KW, Guenther PM, et al. The Food Propensity Questionnaire:  
4  
5 Concept, Development, and Validation for Use as a Covariate in a Model to Estimate Usual  
6  
7 Food Intake. *J Am Diet Assoc.* 2006;**106**:1556-63.
- 8  
9  
10 11. Freedman LS, Midthune D, Carroll RJ, et al. Adjustments to improve the estimation  
11  
12 of usual dietary intake distributions in the population. *J Nutr.* 2004;**134**:1836-43.
- 13  
14 12. Kipnis V, Midthune D, Buckman DW, et al. Modeling Data with Excess Zeros and  
15  
16 Measurement Error: Application to Evaluating Relationships between Episodically  
17  
18 Consumed Foods and Health Outcomes. *biometrics.* 2009;**65**:1003-10.
- 19  
20  
21 13. Mackerras DEM, Singh GR, Eastman CJ. Iodine status of Aboriginal teenagers in the  
22  
23 Darwin region before mandatory iodine fortification of bread. *Med J Aust.* 2011;**194**:126-30.
- 24  
25 14. Zimmermann MB, Andersson M. Assessment of iodine nutrition in populations: past,  
26  
27 present, and future. *Nutr Rev.* 2012;**70**:553-70.
- 28  
29  
30 15. Looker AC, Dallman PR, Carroll MD, et al. Prevalence of iron deficiency in the  
31  
32 United States. *JAMA.* 1997;**277**:973-6.
- 33  
34 16. Folstein MF, Folstein SE, McHugh PR. Mini-Mental State - practical method for  
35  
36 grading cognitive state of patients for clinician *J Psych Res.* 1975;**12**:189-98.
- 37  
38 17. Guigoz Y, Vellas B, Garry PJ. Mini nutritional assessment : A practical assessment  
39  
40 tool for grading the nutritional state of elderly patients. *Facts Res Gerontol.* 1994;**4**:15-59.
- 41  
42 18. Mahoney F, Barthel D. Functional evaluation: The Barthel Index. *Maryland State*  
43  
44 *Med J.* 1965;**14**:56-61.
- 45  
46 19. Ohashi T, Yamaki M, Pandav CS, et al. Simple microplate method for determination  
47  
48 of urinary iodine. *Clin Chem.* 2000;**46**:529-36.
- 49  
50  
51 20. Subcommittee on Interpretation and Uses of Dietary Reference Intakes, Reference  
52  
53 SCotSEoD, Intakes. *Dietary Reference Intakes: Applications in Dietary Planning.*  
54  
55 Washington, DC: The National Academies Press; 2003.
- 56  
57  
58  
59  
60

- 1  
2  
3 21. Baines J, Cunningham J, Leemhuis C, et al. Risk Assessment to Underpin Food  
4 Regulatory Decisions: An Example of Public Health Nutritional Epidemiology. *Nutrients*.  
5 2011;**3**:164-85.  
6  
7  
8  
9  
10 22. Tan L, Charlton KE, Roodenrys S, et al. Validation of an iodine-specific Food  
11 Frequency Questionnaire to estimate dietary iodine intake in older Australians. *Nutr Diet*.  
12 2013;**70**:71-8.  
13  
14  
15  
16 23. Depaoli K, Seal JA, Taylor R, editors. Progressive improvements in iodine status in  
17 Tasmania with voluntary then mandatory fortification: Preliminary results from the 2011  
18 Tasmanian Urinary Iodine Survey. *Nutrition & Dietetics*; 2012: Blackwell Publishing Asia.  
19  
20  
21  
22  
23 24. U.S. Centers for Disease Control and Prevention. Second National Report on  
24 Biochemical Indicators of Diet and Nutrition in the U.S. Population 2012. Atlanta, GA.:  
25 National Center for Environmental Health; 2012.  
26  
27  
28  
29 25. Konig F, Andersson M, Hotz K, et al. Ten Repeat Collections for Urinary Iodine from  
30 Spot Samples or 24-Hour Samples Are Needed to Reliably Estimate Individual Iodine Status  
31 in Women. *J Nutr*. 2011;**141**:2049-54.  
32  
33  
34  
35  
36 26. National Cancer Institute. Usual Dietary Intakes: SAS macros for analysis of a single  
37 dietary component: [http://riskfactor.cancer.gov/diet/usualintakes/macros\\_single.html](http://riskfactor.cancer.gov/diet/usualintakes/macros_single.html); 2010.  
38  
39  
40 27. Sempos CT, Johnson NE, Smith EL, et al. Effects of intraindividual and  
41 interindividual variation in repeated dietary records. *Am J Epi*. 1985;**121**:120-30.  
42  
43  
44  
45 28. Food Standards Australia New Zealand (FSANZ). The 2007 Australian National  
46 Children's Nutrition and Physical Activity Survey Volume Eight: Dietary exposure to food  
47 sourced chemicals. Canberra: Department of Health and Ageing; 2012.  
48  
49  
50  
51 29. Tooze JA, Kipnis V, Buckman DW, et al. A mixed-effects model approach for  
52 estimating the distribution of usual intake of nutrients: The NCI method. *Stat Med*.  
53 2010;**29**:2857-68.  
54  
55  
56  
57  
58  
59  
60



1  
2  
3 **Intra-individual variation in urinary iodine concentrations: effect of adjustment on**  
4 **population distribution using two and three repeated spot urine collections**  
5  
6  
7

8 Karen E Charlton, M.Phil (Epi), M.Sc., PhD, APD, School of Health Sciences, Faculty of  
9 Health and Behavioural Sciences, University of Wollongong, New South Wales, Australia  
10  
11

12  
13 Marijka J Batterham, M.Med.Stat., M.Sc(Nutr&Diet), PhD, AdvAPD, AStat, Statistical  
14 Consulting Service, University of Wollongong, NSW, Australia  
15  
16

17  
18 Li Min Tan Buchanan, B.Sc (Hons). School of Health Sciences, Faculty of Health and  
19 Behavioural Sciences, University of Wollongong, New South Wales, Australia  
20  
21

22  
23 Dorothy Mackerras, PhD, MPH, Office of the Chief Scientist, Food Standards Australia New  
24 Zealand, Canberra, ACT, Australia & Menzies School of Health Research, Institute of  
25 Advanced Studies, Charles Darwin University, Darwin, NT, Australia  
26  
27  
28  
29

30  
31  
32  
33  
34 Corresponding author: Associate Professor Karen Charlton, School of Health Sciences,  
35 Faculty of Health and Behavioural Sciences, University of Wollongong, Northfields Avenue,  
36 Wollongong, New South Wales, Australia.  
37  
38  
39

40  
41  
42 Tel: +61-2-42214754; Fax: +61-2-4221 3486. Email: karenc@uow.edu.au  
43  
44

45 **Contribution of each author:**  
46

47 Karen E Charlton: Conceptualisation of study design, drafting initial manuscript  
48

49 Marijka J Batterham: Statistical analysis, editing of manuscript.  
50

51 Li Min Tan Buchanan: Participant recruitment, data collection, data entry, editing of  
52 manuscript.  
53  
54

55 Dorothy Mackerras: Statistical interpretation, editing of manuscript.  
56  
57  
58  
59  
60

### Acknowledgements

A small grant was obtained from the Faculty of Health and Behavioural Sciences (Faculty Research Committee) of the University of Wollongong. The Faculty Research Committee had no role in the design, analysis or writing of this article. No authors have any conflicts of interest. Associate Professor Gary Ma is thanked for analysis of the urinary iodine concentrations. Joanna Russell provided editorial assistance.

Word count, excluding title page, abstract, references: 2591

## Summary

### *Article focus*

- The iodine status of populations is defined by calculating median urinary iodine concentrations (UIC) from spot urine samples collected in surveys.
- High intra-individual (day-to-day) variation in urinary iodine excretion leads to an overdispersed distribution.
- Methods used in other areas of research to correct for intra-individual variation were applied to three repeated spot urine collections from a sample of older Australians to estimate a UIC distribution more reflective of long-term usual status.

### *Key messages*

- Collection of a single urine sample leads to incorrect conclusions about the extremes of the population distribution of UIC.
- Adjustment using analysis of variance reduced the spread of the distribution more than calculating an average of each person's samples. Application of this method to surveillance of population iodine status and iodine fortification programmes could permit a more detailed assessment of the population and relevant subgroups.
- In this sample of older adults, three spot urine collections did not add value compared to two collections.

### *Strengths and limitations:*

Older adults, who typically have a less varied diet than younger populations, were sampled therefore generalizability to other age groups may be limited.

## Abstract

Background: Iodine deficiency is assessed on a population level by comparing median spot urinary iodine concentrations (UIC) against references for pregnant and non-pregnant states. Intra-individual variation of a single UIC results in an overdispersed distribution and consequent errors in estimating the prevalence of deficiency and excess.

Methods: UIC data collected from 84 healthy volunteers, 60-95y from New South Wales, Australia, prior to the mandatory fortification programme, was used to determine the effect of adjustment for intra-individual variation on estimations of iodine deficiency and the population distribution. Three spot urine samples were collected, each one week apart. Repeated measures analysis of variance determined between-person ( $s_b$ ) and total ( $s_{obs}$ ) standard deviations. Adjusted UIC values were calculated as [(person's UIC – group mean) x ( $s_b/s_{obs}$ )] + group mean, and a corrected UIC distribution calculated.

Results: The  $s_b/s_{obs}$  for using 3-samples and 2-samples was 0.83 and 0.79, respectively.

Following adjustment for intra-individual variation, the proportion with UIC < 50  $\mu\text{g}/\text{L}$  reduced from 33 % to 19%, while the proportion with UIC  $\geq$  100  $\mu\text{g}/\text{L}$  changed from 21% to 17%. The 95<sup>th</sup> centile UIC decreased from 176 to 136  $\mu\text{g}/\text{L}$ . Adjustment by taking averages yielded a lesser degree of contraction in the distribution than the analysis of variance method.

Conclusions: The addition of information about intra-individual variability has potential for increasing the interpretability of UIC data collected to monitor the iodine status of a population.

**Keywords:** iodine, urinary iodine concentration, intra-individual variation, distribution

## Introduction

Iodine deficiency is one of the most common nutrient deficiencies in the world, with almost one billion people affected. Populations that consume diets that contain small amounts of fish and seafood, moderate to low quantities of milk and dairy products, and include locally produced fruits and vegetables grown in iodine-poor soils are likely to be iodine deficient.

Iodine deficiency impacts across the life stages.[1] It affects growth and development (both cognitive and motor) during pregnancy, infancy and childhood. In older adults, iodine deficiency may play a role in declining cognitive function.[1] Consequently, good quality population-level data on iodine status is required to assess population status and design strategies which correct any deficiency but avoid introducing excessive intakes. The iodine status of populations is defined by calculating urinary iodine concentrations (UIC) from spot urine samples collected in a representative sample and comparing the median UIC (MUIC) against reference ranges.[2] Daily urinary excretion of iodine closely reflects iodine intake in non-pregnant populations therefore MUIC of a group is considered to be a valid biomarker of the status of that group.[3] However, the concentration measured in a single spot sample has large variation from day-to-day within individuals,[4-6]. This increases the spread of the distribution [7, 8] so that it does not reflect the range of long-term or 'usual' iodine status around the median in the population. It is the usual intake of iodine, not the intake on any one day that determines iodine status of groups. Consequently, a method to reduce or remove the effects of the measurement error due to the intra-individual variation that results from collecting a single spot urine sample from each survey participant would allow greater description of the population status.

Several methods exist to correct for intra-individual variation in population survey data. One method is to collect multiple days of data on each survey participant and average the data for each participant. This has substantial logistical costs when conducting a national survey.

1  
2  
3 Another method is to apply a correction factor to the distribution.[8, 9] This requires  
4  
5 estimating the correction factor, for example by collecting multiple samples from a  
6  
7 representative subset of the survey population  
8  
9

10  
11 This second method has been applied many times to dietary intake data [10-12] but has been  
12  
13 applied less frequently to biochemical data.[13-15] In a survey of indigenous Australian  
14  
15 adolescents with MUIC of 51  $\mu\text{g/L}$ , correcting the distribution based on two urine  
16  
17 samples per person, reduced the 95<sup>th</sup> centile from 129  $\mu\text{g/L}$  to 92  
18  
19  $\mu\text{g/L}$ . [13, 14] have highlighted the widespread misuse of calculating the proportions  
20  
21 of UIC below the cut-off level of 100  $\mu\text{g/L}$  to estimate the prevalence of iodine  
22  
23 deficiency. This will over- or underestimate the proportion with deficiency depending on the  
24  
25 location of the median. In the previous example,[13] the raw data would be misinterpreted as  
26  
27 showing that 90% were <100  $\mu\text{g/L}$ , whereas this was 97% after correction for  
28  
29 within person variation. In clearly deficient populations, this difference is not important for  
30  
31 program planning. However as a population approaches sufficiency, accurate estimation  
32  
33 becomes more important for refining programs. Similarly in replete populations, an accurate  
34  
35 estimate of the high intakes is needed to assess whether part of the population is reaching  
36  
37 potentially adverse levels.  
38  
39  
40  
41  
42  
43  
44

45 Remote indigenous people have a different lifestyle from that of urbanised non-Indigenous  
46  
47 Australians. In this study, we investigate the intra-individual variation in UIC in older non-  
48  
49 Indigenous Australians, living in an urban iodine deficient area prior to the introduction of  
50  
51 mandatory fortification. We extend previous work by examining the impact of having two  
52  
53 versus three samples for calculating the correction factor and compare this to the effect of  
54  
55 averaging the results for each person.  
56  
57  
58  
59  
60

## Methods

### Participants and recruitment

Between May and September 2009, 110 ~~English-speaking men and women~~ adults aged 60 - 95 years volunteered for a study that investigated the association between iodine status and cognition. English-speaking men and women ~~Volunteers~~ were recruited from a random selection of aged care facilities (independent, assisted and low care living) in the Illawarra region, south of Sydney in Australia. Of the 110 participants, 84 subjects (25 men) met the study inclusion criteria and were enrolled. Twenty-six subjects were excluded due to: a) diagnosed dementia and/or Alzheimer's disease, b) cognitive decline as indicated by a Mini-Mental State Examination (MMSE<sup>9</sup> score of  $\leq 23$ , [16] c) a previous stroke, d) current use of thyroxine or any other medications that may affect memory, 5) uncontrolled hypertension (blood pressure (BP)  $\geq 160/95$  mm Hg), and e) uncontrolled diabetes (blood glucose (BG)  $\geq 7.8$  mmol/l). The study protocol was approved by the Human Research Ethics Committee of the University of Wollongong and all participants provided written informed consent.

Weight (Tanita Scale, TBG622, Tanita Inc., Tokyo, Japan) and height (stadiometer) of subjects were measured. Body mass index was calculated as the ratio of weight (kg) divided by height squared ( $m^2$ ). Nutritional status was assessed using the 18-item Mini Nutritional Assessment (MNA) which has been previously validated in older adults and classifies according to categories of well nourished, at-risk, or malnourished. [17] The Barthel index [18] was administered to assess ability to perform Activities of Daily Living, with a score of  $>50/100$  indicating independence.

### Biochemical data

1  
2  
3 Participants were provided with written instructions for spot urine sample collections, which  
4 included collection of the first voiding of the day, on the same day each week, where  
5 possible, over a three-week period. Urine samples were stored at -80°C and batch-analysed  
6 by the accredited laboratory of the Institute of Clinical Pathology and Medical Research  
7 (ICPMR), Westmead Hospital (Sydney, NSW, Australia). UIC was analysed using an  
8 adaptation of the Sandell-Kolthoff method using a ammonium persulphate digestion and  
9 microplate reading.[19] The coefficient of variation (CV) of the urinary iodine assay in the  
10 ICPMR laboratory is 16.7% at  $46 \pm 7.72 \mu\text{g/L}$ , 5.8% at  $153 \pm 8.9 \mu\text{g/L}$ , and 8.65% at  $347 \pm$   
11  $30 \mu\text{g/L}$ . The group MUIC was compared to population-specific reference values.[2]

### 22 23 24 25 *Statistical analyses*

26  
27 The UIC data were transformed using the natural logarithm to improve normality. Repeated  
28 measures analysis of variance was performed to determine the between-person ( $s_b$ ) and total  
29 ( $s_{\text{obs}}$ ) standard deviations. An adjusted log UIC value was calculated for each person as[20] :  
30  
31 Adjusted UIC = [(person's day 1 UIC – group mean for day 1) \* ( $s_b \div s_{\text{obs}}$ )] + group mean for  
32 day 1. (Equation 1)

33  
34 The results were exponentiated. The adjustment procedure was performed twice using SAS  
35 (V9.2, SAS Cary, NC). First the correction factor ( $s_b/s_{\text{obs}}$ ) was calculated using all three  
36 replicates, then it was calculated using only the first two replicates.

37  
38 We also calculated the average for each person using all three replicates and for the first two  
39 replicates. Centiles of the distribution and the proportion below selected values were  
40 calculated for the raw Day 1 data and for distributions derived using adjustment or averaging.  
41  
42 Descriptive analyses were performed using IBM SPSS (V19.0 IBM Corporation, Armonk  
43  
44 NY).



## Results

Sociodemographic characteristics of the study participants are shown in Table 1. All except four (5%) were classified as being well nourished according to the MNA classification, with the remainder in the “at risk” category. All participants were independently able to perform activities of daily living.

**Table 1**

Demographic and clinical characteristics of the study subjects (n = 84)

| Characteristics                                                        | Subjects (n =84) (%)     |
|------------------------------------------------------------------------|--------------------------|
| Sex (%)                                                                |                          |
| Men                                                                    | 25(30%)                  |
| Women                                                                  | 59(70%)                  |
| Age (years)                                                            | 74 ± 8 <sup>a</sup>      |
| BMI <sup>b</sup>                                                       |                          |
| Mean                                                                   | 28.4 ± 4.7 <sup>a</sup>  |
| Underweight (< 18.5 kg/m <sup>2</sup> )                                | 0 (0%)                   |
| Normal Weight (18.5 - 24.9 kg/m <sup>2</sup> )                         | 16(19%)                  |
| Overweight (≥ 25 kg/m <sup>2</sup> )                                   | 45 (54%)                 |
| Obese ≥ (30 kg/m <sup>2</sup> )                                        | 23 (27%)                 |
| <b>MNA score</b>                                                       |                          |
| —Mean                                                                  | 27.2 ± 3.6 <sup>††</sup> |
| Malnourished (<17 points)                                              | 0 (0%)                   |
| At risk of Malnutrition (17–23.5 points)                               | 4 (5%)                   |
| Well-nourished (≥24 points)                                            | 78 (93%)                 |
| Unknown                                                                | 2 (2%)                   |
| <b>Barthel Index<sup>17</sup></b>                                      |                          |
| —Able to independently perform activities of daily living (>50 points) | 84 (100%)                |
| <b>MMSE score<sup>18</sup></b>                                         |                          |
| 0 to 23                                                                | 0 (0%)                   |
| 24-30                                                                  | 83 (99%)                 |
| Unknown                                                                | 1 (1%)                   |

|                 |          |
|-----------------|----------|
| Education level |          |
| ≤ Year 12       | 39 (47%) |
| > Year 12       | 44 (52%) |
| Unknown         | 1 (1%)   |

<sup>a</sup> Mean ± standard deviation

<sup>b</sup> Calculated as kg/m<sup>2</sup>

MUIC of the study population using the first spot urine collection indicated mild iodine deficiency (65.5 (IQR 42; 89)) µg/L. Correlations for transformed urinary iodine concentration values were: Days 1 and 2: r=0.48; p<0.01; Days 1 and 3: r=0.43; p<0.01; Days 2 and 3: r=0.41; p<0.01. The distribution of urinary iodine concentrations calculated by the different methods is shown in Table 2 and Figure 1. The  $s_b/s_{obs}$  was 0.83 when calculated using the three replicates and 0.79 when calculated using two replicates; i.e. the contraction in the distribution was slightly less with two replicates than three. Compared to the raw distribution, adjustment and averaging both reduced the spread of the distribution, especially at the upper end owing to the right skew in the data. Following adjustment using the three urine collections, the MUIC remained unchanged but the IQR was shifted upwards 65.2 (55; 94) while the upper end of the distribution (95<sup>th</sup> centile) changed from 176 to 136 µg/L. The percentage of participants with UIC  $\leq 100$  ~~µg/L~~ ~~µg/L~~ ~~µg/L~~ increased decreased from ~~79.21~~ % to ~~83.17~~ % following adjustment.

**Table 2**

Urinary iodine concentration distribution, raw data from one day, after adjustment for intra-individual variation of two and three spot sample collections, and averages of multiple collections

| Centile          | Urinary iodine concentration distributions ( <del>µg/L</del> <del>µg/L</del> ) |                            |                                    |                            |                                    |
|------------------|--------------------------------------------------------------------------------|----------------------------|------------------------------------|----------------------------|------------------------------------|
|                  | Raw data for Day 1                                                             | Average of Day 1 and Day 2 | Day 1 corrected using 2 replicates | Average of Days 1, 2 and 3 | Day 1 corrected using 3 replicates |
| 5 <sup>th</sup>  | 32.25                                                                          | 29.7                       | 35.9                               | 31.3                       | 40.0                               |
| 10 <sup>th</sup> | 35.50                                                                          | 35.5                       | 40.8                               | 38.3                       | 43.0                               |
| 25 <sup>th</sup> | 42.25                                                                          | 48.6                       | 52.1                               | 55.2                       | 55.4                               |
| 50 <sup>th</sup> | 65.5                                                                           | 65.5                       | 66.8                               | 69.0                       | 65.2                               |

|                                                                  |              |              |              |              |              |
|------------------------------------------------------------------|--------------|--------------|--------------|--------------|--------------|
| 75 <sup>th</sup>                                                 | 89.5         | 99.1         | 90.0         | 98.9         | 94.3         |
| 90 <sup>th</sup>                                                 | 123.5        | 146          | 115.8        | 138.8        | 118.0        |
| 95 <sup>th</sup>                                                 | 175.8        | 167.4        | 125.7        | 170.5        | 135.8        |
| Maximum                                                          | 340.0        | 278.5        | 204.8        | 222.0        | 167.9        |
| Percent < 20<br><u>µg/L</u> / <u>µg/L</u> / <u>µg/L</u>          | 1%           | 0%           | 0%           | 0%           | 0%           |
| Percent < 50<br><u>µg/L</u> / <u>µg/L</u> / <u>µg/L</u>          | 33%          | 27%          | 21%          | 20%          | 19%          |
| Percent $\geq$<br>100<br><u>µg/L</u> / <u>µg/L</u> / <u>µg/L</u> | <u>7921%</u> | <u>7624%</u> | <u>8218%</u> | <u>7624%</u> | <u>8317%</u> |

Taking an average of the three replicates also yielded similar results to taking an average of only two replicates. The averaging method contracted the distribution less than the adjustment method and, in particular had less effect in drawing the upper tail towards the median.

**Figure 1 Population distribution of urinary iodine, according to number of days of spot urine collection**

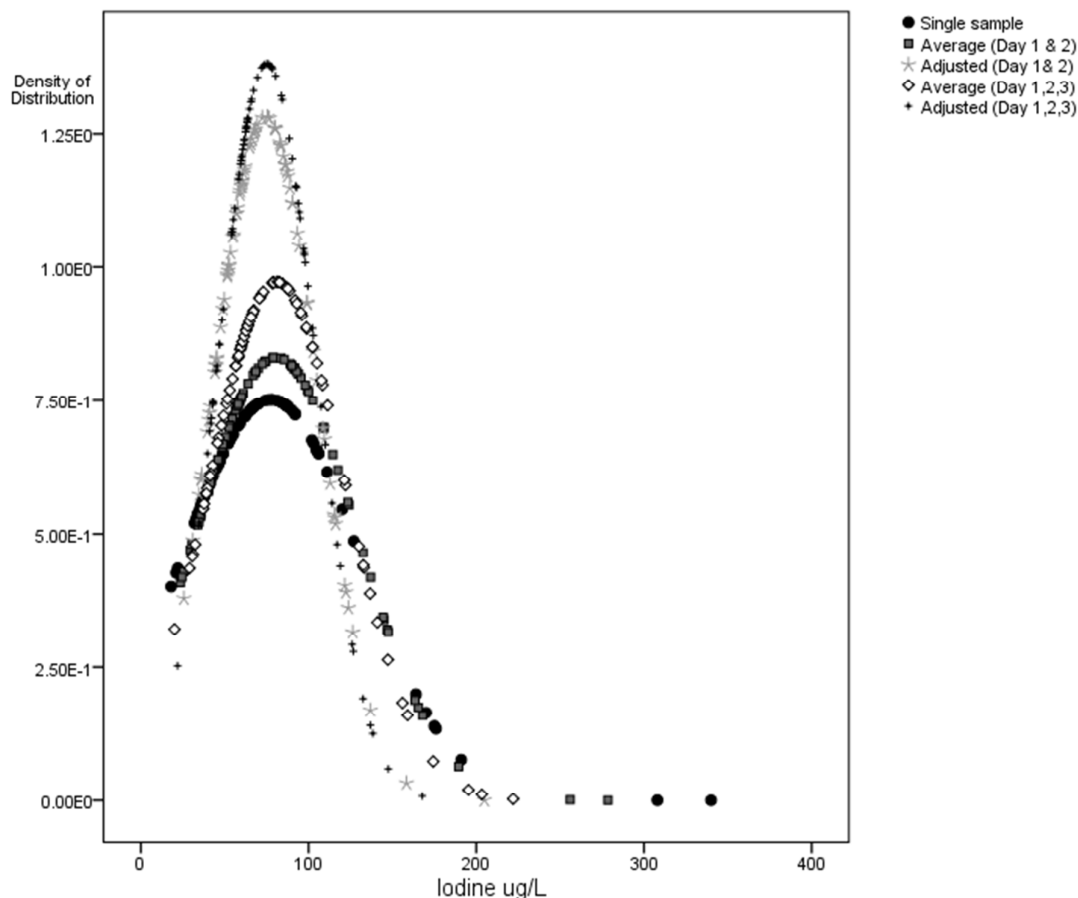

## Discussion

In this population with a suboptimal iodine status, the collection of a single urine sample from each participant would lead to different conclusions about the extremes of the population distribution of UIC. This has also been shown previously in Indigenous Australian adolescents [13] and young Swiss women.[14]

In our population, there was no gain in having three, rather than two, samples as both adjustment factors were approximately 0.8 on the natural logarithmic scale. This means that the standard deviation of the final distribution is 80% of the original. The lower the ratio, the higher the correction - for example, a ratio of 0.5 would have resulted in a distribution with a

1  
2  
3 standard deviation of half the width of the original.[21] We do not know whether having a  
4  
5 greater number of replicates, such as seven or 14, or including different seasons, would have  
6  
7 yielded the same result. Our urinary findings are consistent with the low variability in dietary  
8  
9 iodine intake assessed at the same time in this population living in low level residential aged  
10  
11 care facilities.[22] A similar adjustment ratio of 0.69 on the natural logarithmic scale for  
12  
13 UIC has been reported in indigenous adolescents from the Darwin area, whose dietary  
14  
15 patterns are limited in variety.[13] We hypothesize that the degree of adjustment would be  
16  
17 larger in other populations that have more variety in food intake.  
18  
19

20  
21  
22  
23 Heterogeneity in the iodine content of different foods and their frequency of consumption in  
24  
25 different populations will affect the magnitude of intra-individual variability in UIC. This  
26  
27 suggests that the intra-individual variability in UIC would change after a fortification  
28  
29 program is introduced. It could be further hypothesised that the intra-individual variability  
30  
31 might increase if one or a small number of foods is fortified, particularly at high  
32  
33 concentrations. In Tasmania, the interquartile range widened as the MUIC value increased  
34  
35 following iodisation of salt (25-65g iodine/kg salt) used in bread. Pre-fortification, MUIC in  
36  
37 schoolchildren was 73 (IQR 56-100) µg/L, which increased to 108 (73-158) µg/L following  
38  
39 voluntary fortification, and to 132µg/L (96-198) µg/L) post mandatory fortification.[23]  
40  
41  
42 However, it is not possible to compare these results to studies which report other parameters  
43  
44 for the UIC distribution such as the range [14] or the 10-90<sup>th</sup> centiles.[24] It is less clear  
45  
46 whether variability would increase or decrease if a wide range of foods are fortified and/or at  
47  
48 a lower concentration. We hypothesise that adjustment factors need to be reassessed if iodine  
49  
50 intake changes and multiple factors might be needed if there is geographical variation in  
51  
52 iodine status within a country.  
53  
54  
55  
56  
57  
58  
59  
60

1  
2  
3 The greater narrowing in population distribution that results from the adjustment method,  
4 compared to the averaging method, is expected if multiple days are needed to estimate the  
5 long-term UIC for an individual. This is because the average of few days of urinary collection  
6 would still contain intra-individual variation. However, studies that collect a greater number  
7 of replicate samples than in the current study are still needed to compare the distribution  
8 determined by statistical adjustment to a directly assessed long-term average UIC. Another  
9 consideration is the use of spot urine samples as a proxy for assessment of iodine status on a  
10 population level. A spot sample does not reflect intake over an entire day for which a 24-hour  
11 collection would be needed. Konig et al [25] have reported a trend for higher intra-individual  
12 variation for spot UIC (38 %) versus measured 24-hour urinary iodine excretion (32 %).

13  
14  
15  
16  
17  
18  
19  
20  
21  
22  
23  
24  
25  
26  
27 Our study sample comprised older adults, an age group who have been studied least for  
28 iodine status, and who also often have impaired renal function. We have previously  
29 suggested that spot urinary iodine concentrations may be under-estimating 24 hr excretion in  
30 this study population [22] but this would not impact on intra-individual variability of UIC  
31 which is the topic of the current paper.- Any variation in day-to-day fluid intake would be  
32 included in the changing UIC for each person in the study on each day of collection.

33  
34  
35  
36  
37  
38  
39  
40  
41 However, as the samples were all collected within a three week period, we would not have  
42 included any variation in fluid intake related to seasons. This may would have  
43 underestimated the degree of adjustment in this population. However a reduction in total  
44 fluid intake, and therefore urine volume, might or might not affect the day-to-day variation.

45  
46  
47  
48  
49  
50  
51  
52  
53  
54  
55  
56  
57  
58  
59  
60  
In our study, we had replicate samples on all participants. A more logistically feasible  
alternative in a large survey is to collect the replicates in a representative sub-set and apply  
the adjustment factor calculated in the sub-set to the whole population. It may be necessary  
to subdivide the population, for example, by age and sex, and ensure that there are enough

1  
2  
3 participants in each sub-division to permit a suitable range of adjustment factors to be  
4  
5 calculated. The method we have used [20] is the simplest of several methods that have a  
6  
7 similar purpose.[26] The disadvantage of collecting replicates in a sub-set only is that,  
8  
9 although an estimate of the usual UIC distribution of the population is obtained, the method  
10  
11 treats each individual as representative of a larger group and so the value calculated for each  
12  
13 individual in Equation 1 is theoretical. Therefore, if it is desired to link intake with excretion  
14  
15 at an individual level, then replicate information about both intake and excretion for each  
16  
17 survey participant would be preferable but it is also possible to correct a regression  
18  
19 coefficient for within person variability.[27] In addition, the method we used assumes that  
20  
21 the data can be normalised. If this is not true, then alternatives include calculating an average  
22  
23 for each participant [28] or using a complex method such as the National Cancer Institute  
24  
25 method.[29]  
26  
27  
28  
29  
30  
31

## 32 **Conclusion**

33  
34 In a sample of healthy older Australian adults who were iodine deplete, the use of two or  
35  
36 three spot urine samples for adjustment of intra-individual variation in urinary iodine  
37  
38 concentration resulted in a narrowed population distribution, particularly at the upper end.  
39  
40 Statistical adjustment yielded a stronger correction than averaging the replicates. There was  
41  
42 no important gain in collecting a third sample in this population; however this finding might  
43  
44 be specific to our group and not generalizable to other age groups. The impact of the  
45  
46 adjustment in narrowing the distribution would be greater in groups with more varied dietary  
47  
48 intakes, and therefore wider intra-individual variation in UIC. These results provide a case for  
49  
50 further work to investigate the usefulness of determining adjustment factors to remove intra-  
51  
52 individual variability as part of population assessment of iodine status.  
53  
54  
55  
56  
57  
58  
59  
60

1  
2  
3  
4  
5  
6  
7  
8  
9  
10  
11  
12  
13  
14  
15  
16  
17  
18  
19  
20  
21  
22  
23  
24  
25  
26  
27  
28  
29  
30  
31  
32  
33  
34  
35  
36  
37  
38  
39  
40  
41  
42  
43  
44  
45  
46  
47  
48  
49  
50  
51  
52  
53  
54  
55  
56  
57  
58  
59  
60

|

For peer review only



## References

1. Zimmermann MB, Jooste PL, Pandav CS. Iodine-deficiency disorders. *Lancet*. 2008;**372**:1251-62.
2. World Health Organization. Assessment of iodine deficiency disorders and monitoring their elimination. 3rd Edition ed. Geneva: WHO; 2007.
3. Ristic-Medic D, Piskackova Z, Hooper L, Ruprich J, Casgrain A, Ashton K, et al. Methods of assessment of iodine status in humans: a systematic review. *Am J Clin Nutr*. 2009;**89**:2052S-69S.
4. Rasmussen LB, Ovesen L, Christiansen E. Day-to-day and within-day variation in urinary iodine excretion. *Eur J Clin Nutr*. 1999;**53**:401-7.
5. Rasmussen LB, Ovesen L, Bulow I, Jorgensen T, Knudsen N, Laurberg P, et al. Dietary iodine intake and urinary iodine excretion in a Danish population: effect of geography, supplements and food choice. *Br J Nutr*. 2002;**87**:61-9.
6. Als C, Helbling A, Peter K, Haldimann I, Zimmerli B, Gerber H. Urinary iodine concentration follows a circadian rhythm: A study with 3023 spot urine samples in adults and children. *J Clin Endocrinol Metab*. 2000;**85**:1367-9.
7. Andersen S, Karmisholt J, Pedersen KM, Laurberg P. Reliability of studies of iodine intake and recommendations for number of samples in groups and in individuals. *Br J Nutr*. 2008;**99**:813-8.
8. Armstrong BK, White E, Saracci R. Principles of exposure measurement in epidemiology. Oxford: Oxford University Press; 1992.
9. Dyer AR, Shipley M, Elliott P. Urinary electrolyte excretion in 24 hours and blood-pressure in the Intersalt study. 1. Estimates of reliability *Am J Epi*. 1994;**139**:927-39.

10. Subar AF, Dodd KW, Guenther PM, Kipnis V, Midthune D, McDowell M, et al. The Food Propensity Questionnaire: Concept, Development, and Validation for Use as a Covariate in a Model to Estimate Usual Food Intake. *J Am Diet Assoc.* 2006;**106**:1556-63.
11. Freedman LS, Midthune D, Carroll RJ, Krebs-Smith S, Subar AF, Troiano RP, et al. Adjustments to improve the estimation of usual dietary intake distributions in the population. *J Nutr.* 2004;**134**:1836-43.
12. Kipnis V, Midthune D, Buckman DW, Dodd KW, Guenther PM, Krebs-Smith SM, et al. Modeling Data with Excess Zeros and Measurement Error: Application to Evaluating Relationships between Episodically Consumed Foods and Health Outcomes. *biometrics.* 2009;**65**:1003-10.
13. Mackerras DEM, Singh GR, Eastman CJ. Iodine status of Aboriginal teenagers in the Darwin region before mandatory iodine fortification of bread. *Med J Aust.* 2011;**194**:126-30.
14. Zimmermann MB, Andersson M. Assessment of iodine nutrition in populations: past, present, and future. *Nutr Rev.* 2012;**70**:553-70.
15. Looker AC, Dallman PR, Carroll MD, Gunter EW, Johnson CL. Prevalence of iron deficiency in the United States. *JAMA.* 1997;**277**:973-6.
16. Folstein MF, Folstein SE, McHugh PR. Mini-Mental State - practical method for grading cognitive state of patients for clinician *J Psych Res.* 1975;**12**:189-98.
17. Guigoz Y, Vellas B, Garry PJ. Mini nutritional assessment : A practical assessment tool for grading the nutritional state of elderly patients. *Facts Res Gerontol.* 1994;**4**:15-59.
18. Mahoney F, Barthel D. Functional evaluation: The Barthel Index. *Maryland State Med J.* 1965;**14**:56-61.
19. Ohashi T, Yamaki M, Pandav CS, Karmarkar MG, Irie M. Simple microplate method for determination of urinary iodine. *Clin Chem.* 2000;**46**:529-36.

- 1  
2  
3 20. Subcommittee on Interpretation and Uses of Dietary Reference Intakes, Reference  
4 SCotSEoD, Intakes. Dietary Reference Intakes: Applications in Dietary Planning.  
5 Washington, DC: The National Academies Press; 2003.  
6  
7  
8  
9  
10 21. Baines J, Cunningham J, Leemhuis C, Hambridge T, Mackerras D. Risk Assessment  
11 to Underpin Food Regulatory Decisions: An Example of Public Health Nutritional  
12 Epidemiology. *Nutrients*. 2011;**3**:164-85.  
13  
14  
15  
16 22. Tan L, Charlton KE, Roodenrys S, Ma G, Batterham M. Validation of an iodine-  
17 specific Food Frequency Questionnaire to estimate dietary iodine intake in older Australians.  
18 *Nutr Diet*. 2013;**70**:71-8.  
19  
20  
21  
22  
23 23. Depaoli K, Seal JA, Taylor R, editors. Progressive improvements in iodine status in  
24 Tasmania with voluntary then mandatory fortification: Preliminary results from the 2011  
25 Tasmanian Urinary Iodine Survey. *Nutrition & Dietetics*; 2012: Blackwell Publishing Asia.  
26  
27  
28  
29  
30 24. U.S. Centers for Disease Control and Prevention. Second National Report on  
31 Biochemical Indicators of Diet and Nutrition in the U.S. Population 2012. Atlanta, GA.:  
32 National Center for Environmental Health; 2012.  
33  
34  
35  
36 25. Konig F, Andersson M, Hotz K, Aeberli I, Zimmermann MB. Ten Repeat Collections  
37 for Urinary Iodine from Spot Samples or 24-Hour Samples Are Needed to Reliably Estimate  
38 Individual Iodine Status in Women. *J Nutr*. 2011;**141**:2049-54.  
39  
40  
41  
42  
43 26. National Cancer Institute. Usual Dietary Intakes: SAS macros for analysis of a single  
44 dietary component: [http://riskfactor.cancer.gov/diet/usualintakes/macros\\_single.html](http://riskfactor.cancer.gov/diet/usualintakes/macros_single.html).; 2010.  
45  
46  
47  
48 27. Sempos CT, Johnson NE, Smith EL, Gilligan CE. Effects of intraindividual and  
49 interindividual variation in repeated dietary records. *Am J Epi*. 1985;**121**:120-30.  
50  
51  
52  
53 28. Food Standards Australia New Zealand (FSANZ). The 2007 Australian National  
54 Children's Nutrition and Physical Activity Survey Volume Eight: Dietary exposure to food  
55 sourced chemicals. Canberra: Department of Health and Ageing; 2012.  
56  
57  
58  
59  
60

1  
2  
3  
4  
5  
6  
7  
8  
9  
10  
11  
12  
13  
14  
15  
16  
17  
18  
19  
20  
21  
22  
23  
24  
25  
26  
27  
28  
29  
30  
31  
32  
33  
34  
35  
36  
37  
38  
39  
40  
41  
42  
43  
44  
45  
46  
47  
48  
49  
50  
51  
52  
53  
54  
55  
56  
57  
58  
59  
60

29. Tooze JA, Kipnis V, Buckman DW, Carroll RJ, Freedman LS, Guenther PM, et al. A mixed-effects model approach for estimating the distribution of usual intake of nutrients: The NCI method. Stat Med. 2010;**29**:2857-68.

For peer review only

1  
2  
3  
4  
5  
6  
7  
8  
9  
10  
11  
12  
13  
14  
15  
16  
17  
18  
19  
20  
21  
22  
23  
24  
25  
26  
27  
28  
29  
30  
31  
32  
33  
34  
35  
36  
37  
38  
39  
40  
41  
42  
43  
44  
45  
46  
47  
48  
49  
50  
51  
52  
53  
54  
55  
56  
57  
58  
59  
60

For peer review only

This paper is not a reliability study but we have used the Guidelines for Reporting Reliability and Agreement Studies (GRRAS) checklist as this seems to be the closest in terms of study design.

|                                                                                                        |                                                                                                                                                                                                                                                                                                                                                                                                                                                                                                                                                                                                                                                                                                                                                                                                                                                                                                                                                                                                                                                                                                                                                                                                                                                                                                                                                                                                                                                                                      | Page in manuscript where information appears |
|--------------------------------------------------------------------------------------------------------|--------------------------------------------------------------------------------------------------------------------------------------------------------------------------------------------------------------------------------------------------------------------------------------------------------------------------------------------------------------------------------------------------------------------------------------------------------------------------------------------------------------------------------------------------------------------------------------------------------------------------------------------------------------------------------------------------------------------------------------------------------------------------------------------------------------------------------------------------------------------------------------------------------------------------------------------------------------------------------------------------------------------------------------------------------------------------------------------------------------------------------------------------------------------------------------------------------------------------------------------------------------------------------------------------------------------------------------------------------------------------------------------------------------------------------------------------------------------------------------|----------------------------------------------|
| <b>TITLE AND ABSTRACT</b>                                                                              |                                                                                                                                                                                                                                                                                                                                                                                                                                                                                                                                                                                                                                                                                                                                                                                                                                                                                                                                                                                                                                                                                                                                                                                                                                                                                                                                                                                                                                                                                      |                                              |
| 1. Identify in title or abstract that interrater/intrarater reliability or agreement was investigated. | Title reflects the analysis performed” <b>Intra-individual variation in urinary iodine concentrations: Effect of adjustment on population distribution using two and three repeated spot urine collections .</b><br>“Abstract states “UIC data collected from 84 healthy volunteers, 60-95y from New South Wales, Australia, prior to the mandatory fortification programme was used to determine the effect of adjustment for intra-individual variation on estimations of iodine deficiency and the population distribution.”                                                                                                                                                                                                                                                                                                                                                                                                                                                                                                                                                                                                                                                                                                                                                                                                                                                                                                                                                      | Page 1 and 2                                 |
| <b>INTRODUCTION</b>                                                                                    |                                                                                                                                                                                                                                                                                                                                                                                                                                                                                                                                                                                                                                                                                                                                                                                                                                                                                                                                                                                                                                                                                                                                                                                                                                                                                                                                                                                                                                                                                      |                                              |
| 2. Name and describe the diagnostic or measurement device of interest explicitly                       | Measurement is repeated spot urine samples for analysis of Urinary Iodine Concentration (UIC). This is explained in detail, and the methodological problems associated with the single spot urine (currently the recommended method for population-level assessment of iodine status).                                                                                                                                                                                                                                                                                                                                                                                                                                                                                                                                                                                                                                                                                                                                                                                                                                                                                                                                                                                                                                                                                                                                                                                               | Pages 4 (2 <sup>nd</sup> para),5, and 6      |
| 3. Specify the subject population of interest.                                                         | This is adequately described as follows:<br><i>Remote indigenous people have a different lifestyle from that of urbanised non-Indigenous Australians. In this study, we investigate the intra-individual variation in UIC in older non-Indigenous Australians, living in an urban iodine deficient area prior to the introduction of mandatory fortification. We extend previous work by examining the impact of having two versus three samples for calculating the correction factor and compare this to the effect of averaging the results for each person.</i><br><i>Between May and September 2009, 110 English-speaking men and women aged 60 - 95 years volunteered for a study that investigated the association between iodine status and cognition. Volunteers were recruited from a random selection of aged care facilities (independent, assisted and low care living) in the Illawarra region, south of Sydney in Australia. Of the 110 participants, 84 subjects (25 men) met the study inclusion criteria and were enrolled. Twenty-six subjects were excluded due to: a) diagnosed dementia and/or Alzheimer’s disease, b) cognitive decline as indicated by a Mini-Mental State Examination (MMSE score of &lt;=23,[16] c) a previous stroke, d) current use of thyroxine or any other medications that may affect memory, 5) uncontrolled hypertension (blood pressure (BP) ≥ 160/95 mm Hg), and e) uncontrolled diabetes (blood glucose (BG) ≥ 7.8 mmol/l).</i> | Page 6                                       |
| 4. Specify the rater population of interest (if applicable).                                           | Not applicable to this paper                                                                                                                                                                                                                                                                                                                                                                                                                                                                                                                                                                                                                                                                                                                                                                                                                                                                                                                                                                                                                                                                                                                                                                                                                                                                                                                                                                                                                                                         |                                              |

|                                                                                                                                                |                                                                                                                                                                                                                                                                                                                                                                                                                                                                                                                                                                                                                                                                                                                                                                                                                                                      |                                                    |
|------------------------------------------------------------------------------------------------------------------------------------------------|------------------------------------------------------------------------------------------------------------------------------------------------------------------------------------------------------------------------------------------------------------------------------------------------------------------------------------------------------------------------------------------------------------------------------------------------------------------------------------------------------------------------------------------------------------------------------------------------------------------------------------------------------------------------------------------------------------------------------------------------------------------------------------------------------------------------------------------------------|----------------------------------------------------|
| 5. Describe what is already known about reliability and agreement and provide a rationale for the study (if applicable).                       | Not reliability, but explains the purpose of the paper which addresses intra-individual variability in UIC, as follows:<br><i>Several methods exist to correct for intra-individual variation in population survey data. One method is to collect multiple days of data on each survey participant and average the data for each participant. This has substantial logistical costs when conducting a national survey. Another method is to apply a correction factor to the distribution.[8, 9] This requires estimating the correction factor, for example by collecting multiple samples from a representative subset of the survey population.</i><br><br><i>This second method has been applied many times to dietary intake data [10-12] but has been applied less frequently to biochemical data.[13-15]</i>                                  | Page 5, last para and page 6, 1 <sup>st</sup> para |
| METHODS                                                                                                                                        |                                                                                                                                                                                                                                                                                                                                                                                                                                                                                                                                                                                                                                                                                                                                                                                                                                                      |                                                    |
| 6. Explain how the sample size was chosen. State the determined number of raters, subjects/objects, and replicate observations.                | This was a convenient sample, no power calculation performed. Of the 110 volunteers, 84 were eligible for inclusion. N = 84 – this is similar to another study that assessed variability in Australian indigenous adolescents (Mackerras et al. [10].).<br>Replicate observations (UIC) numbered three urine collections, taken one week apart.                                                                                                                                                                                                                                                                                                                                                                                                                                                                                                      | Page 6                                             |
| 7. Describe the sampling method.                                                                                                               | Volunteers were recruited from a random selection of aged care facilities (independent, assisted and low care living) in the Illawarra region, south of Sydney in Australia. Exclusion criteria described in detail.                                                                                                                                                                                                                                                                                                                                                                                                                                                                                                                                                                                                                                 | Page 6                                             |
| 8. Describe the measurement/rating process (e.g. time interval between repeated measurements, availability of clinical information, blinding). | Replicate observations (UIC) numbered three urine collections, taken one week apart. Protocol for urine collection clearly described. Batch analysis of urinary iodine by the accredited laboratory of the Institute of Clinical Pathology and Medical Research (ICPMR), Westmead Hospital (Sydney, NSW, Australia) described and coefficient of variation (CV) of the urinary iodine assay provided.                                                                                                                                                                                                                                                                                                                                                                                                                                                | Page 7                                             |
| 9. State whether measurements/ratings were conducted independently.                                                                            | Measurements were spot urine collections, same protocol followed for each collection and the same laboratory measured all samples. Accreditation of the laboratory for this analysis is described.                                                                                                                                                                                                                                                                                                                                                                                                                                                                                                                                                                                                                                                   | Page 7                                             |
| 10. Describe the statistical analysis.                                                                                                         | <i>Descriptive analyses were performed using IBM SPSS(V19.0 IBM Corporation, Armonk NY). The 3-day repeated urinary iodine concentration estimates were used to determine a corrected UIC distribution after taking the natural logarithm of the iodine concentration. Repeated measures analysis of variance was performed to determine the between-person (sb) and total (sobs) standard deviations. A corrected UIC value was calculated for each person by adjusting the transformed value for each person, according to the following formula[15] using SAS (V9.2, SAS Cary, NC): Adjusted UIC = [(person's UIC – group mean) * (sb ÷ sobs)] + group mean. After exponentiation, the distribution of UICs was recalculated using the adjusted values and compared to the unadjusted mean values as well as the spot UIC collected on Day 1.</i> | Page 7, 2 <sup>nd</sup> para                       |
| RESULTS                                                                                                                                        |                                                                                                                                                                                                                                                                                                                                                                                                                                                                                                                                                                                                                                                                                                                                                                                                                                                      |                                                    |
| 11. State the actual number of raters and subjects/objects which were included and the number of replicate                                     | See Table 2                                                                                                                                                                                                                                                                                                                                                                                                                                                                                                                                                                                                                                                                                                                                                                                                                                          | Page 9                                             |

|                                                                                                                                                                                                                                                                                                                                                             |                                                                                                  |                                                                                                                                                                                                                                                                                                                                                                                                                                                                                                                                                                                                                                                                                                                                                                                                                                                                                                                                                                                                                                                                                                                                                                                                                                                                                                                                                                                                         |                   |
|-------------------------------------------------------------------------------------------------------------------------------------------------------------------------------------------------------------------------------------------------------------------------------------------------------------------------------------------------------------|--------------------------------------------------------------------------------------------------|---------------------------------------------------------------------------------------------------------------------------------------------------------------------------------------------------------------------------------------------------------------------------------------------------------------------------------------------------------------------------------------------------------------------------------------------------------------------------------------------------------------------------------------------------------------------------------------------------------------------------------------------------------------------------------------------------------------------------------------------------------------------------------------------------------------------------------------------------------------------------------------------------------------------------------------------------------------------------------------------------------------------------------------------------------------------------------------------------------------------------------------------------------------------------------------------------------------------------------------------------------------------------------------------------------------------------------------------------------------------------------------------------------|-------------------|
| 1<br>2<br>3<br>4<br>5<br>6<br>7<br>8<br>9<br>10<br>11<br>12<br>13<br>14<br>15<br>16<br>17<br>18<br>19<br>20<br>21<br>22<br>23<br>24<br>25<br>26<br>27<br>28<br>29<br>30<br>31<br>32<br>33<br>34<br>35<br>36<br>37<br>38<br>39<br>40<br>41<br>42<br>43<br>44<br>45<br>46<br>47<br>48<br>49<br>50<br>51<br>52<br>53<br>54<br>55<br>56<br>57<br>58<br>59<br>60 | observations which were conducted                                                                |                                                                                                                                                                                                                                                                                                                                                                                                                                                                                                                                                                                                                                                                                                                                                                                                                                                                                                                                                                                                                                                                                                                                                                                                                                                                                                                                                                                                         |                   |
|                                                                                                                                                                                                                                                                                                                                                             | 12. Describe the sample characteristics of raters and subjects (e.g. training, experience)       | Accreditation of the laboratory for this analysis is described.                                                                                                                                                                                                                                                                                                                                                                                                                                                                                                                                                                                                                                                                                                                                                                                                                                                                                                                                                                                                                                                                                                                                                                                                                                                                                                                                         | Page 6, last para |
|                                                                                                                                                                                                                                                                                                                                                             | 13. Report estimates of reliability and agreement including measures of statistical uncertainty. | <p>Estimates of reliability not appropriate to this study. Correct statistical results described as follows:</p> <p><i>MUIC of the study population using the first spot urine collection indicated mild iodine deficiency (65.5 (IQR 42; 89) µg/L). Correlations for transformed urinary iodine concentration values were: Days 1 and 2: <math>r=0.48</math>; <math>p&lt;0.01</math>; Days 1 and 3: <math>r=0.43</math>; <math>p&lt;0.01</math>; Days 2 and 3: <math>r=0.41</math>; <math>p&lt;0.01</math>. The distribution of urinary iodine concentrations calculated by the different methods is shown in Table 2 and Figure 1. The <math>s_r/s_{obs}</math> was 0.83 when calculated using the three replicates and 0.79 when calculated using two replicates; i.e. the contraction in the distribution was slightly less with two replicates than three. Compared to the raw distribution, adjustment and averaging both reduced the spread of the distribution, especially at the upper end owing to the right skew in the data. Following adjustment using the three urine collections, the MUIC remained unchanged but the IQR was shifted upwards 65.2 (55; 94) while the upper end of the distribution (95<sup>th</sup> centile) changed from 176 to 136 µg/L. The percentage of participants with UIC <math>\geq</math> 100 µg/L decreased from 21 % to 17 % following adjustment.</i></p> | Page 8, last para |



1  
2  
3  
4  
5  
6  
7  
8  
9  
10  
11  
12  
13  
14  
15  
16  
17  
18  
19  
20  
21  
22  
23  
24  
25  
26  
27  
28  
29  
30  
31  
32  
33  
34  
35  
36  
37  
38  
39  
40  
41  
42  
43  
44  
45  
46  
47  
48  
49  
50  
51  
52  
53  
54  
55  
56  
57  
58  
59  
60

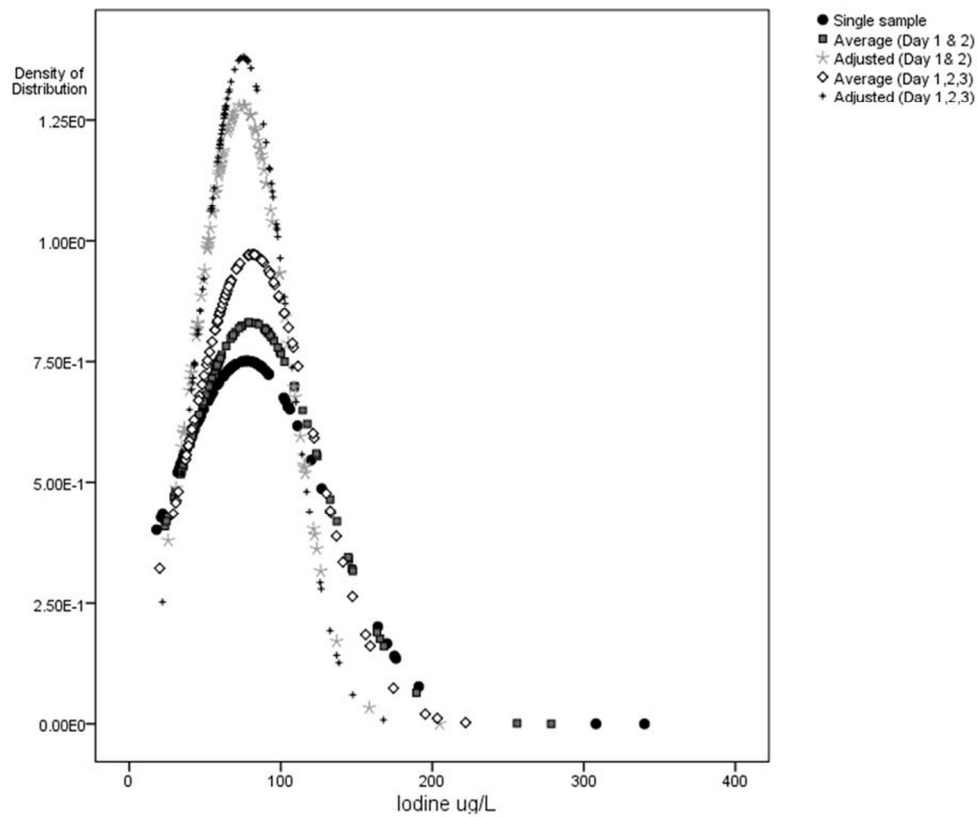

109x90mm (300 x 300 DPI)

View Only
